# Supplementary material for: Theoretical investigation on proton transfer mechanism of extradiol dioxygenase
Source: Royal Society of Chemistry journal article supplement (doi:10.1039/c7ra08080h), 2017-01-01
Supplement: c7ra08080h1.pdf [file c7ra08080h1.pdf]

## Supplementary Information

# **Theoretical investigation on proton transfer mechanism of extradiol dioxygenase**

Yang Liu,<sup>a,b</sup> Ningyu Tu,<sup>b</sup> Wenyu Xie,<sup>b</sup> and Youming Li<sup>\*a</sup>

<sup>a</sup>*State Key Laboratory of Pulp and Paper Engineering, South China University of Technology, Guangzhou, 510640, China.*

<sup>b</sup>*Faculty of Environmental & Biological Engineering, Guangdong University of Petrochemical Technology, Maoming, 525000, China.*

# Table of Contents

|                                                  |          |
|--------------------------------------------------|----------|
| <b>Supported Figures and Tables</b> .....        | <b>3</b> |
| RMSD for the protein backbone atoms.....         | 3        |
| Optimized structures of $^51$ and $^51'$ .....   | 3        |
| Spin population distribution.....                | 3        |
| Optimized structures in triplet state.....       | 4        |
| Optimized structures in septet state.....        | 4        |
| <b>Cartesian Coordinates for QM Region</b> ..... | <b>5</b> |
| Triplet state.....                               | 5        |
| Quintet state.....                               | 11       |
| Septet state.....                                | 17       |

# Supported Figures and Tables

RMSD for the protein backbone atoms

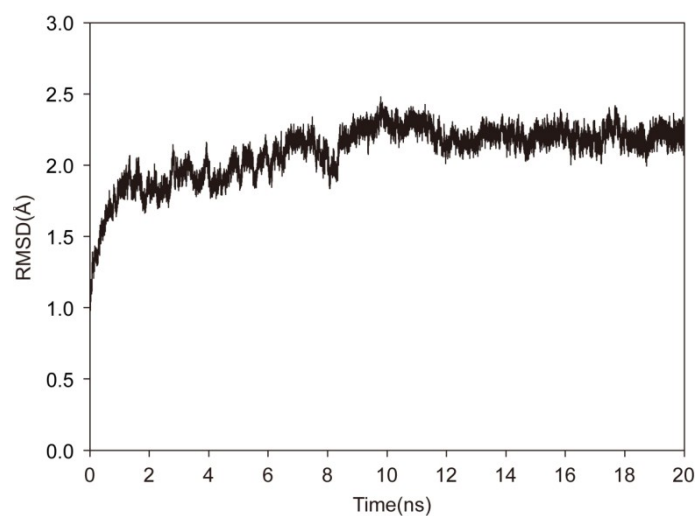

Figure S1 RMSD for the protein backbone atoms along the MD trajectory for HPCD -HPCA

Optimized structures of <sup>5</sup>1 and <sup>5</sup>1'

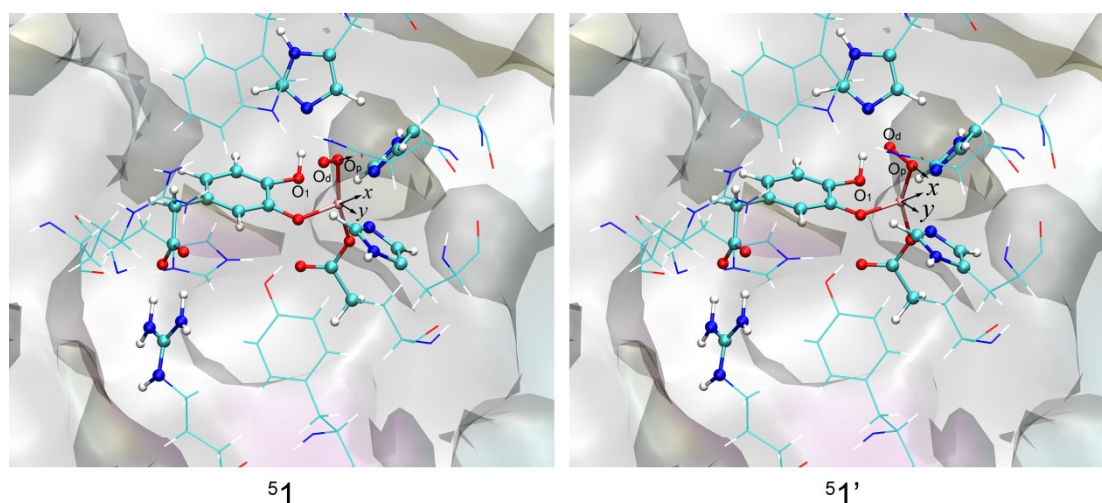

Figure S2 Optimized structures of <sup>5</sup>1 and <sup>5</sup>1'

Spin population distribution

Table S1 Spin population distribution of intermediates and transition states at the B3LYP/6-31G(d) level

|     | Triplet |       |       |       | Quintet |       |       |       | Septet |      |      |      |
|-----|---------|-------|-------|-------|---------|-------|-------|-------|--------|------|------|------|
|     | Fe      | O1    | O2    | HPCA  | Fe      | O1    | O2    | HPCA  | Fe     | O1   | O2   | HPCA |
| 1   | 3.12    | -0.51 | -0.73 | 0.03  | 4.21    | -0.21 | -0.59 | 0.34  | 4.17   | 0.55 | 0.70 | 0.33 |
| 2   | 2.72    | -0.20 | -0.66 | -0.01 | 4.10    | -0.12 | -0.55 | 0.35  | 4.15   | 0.21 | 0.61 | 0.78 |
| 3   | 2.81    | 0.03  | -0.03 | -0.87 | 4.18    | 0.22  | 0.01  | -0.63 | 4.19   | 0.27 | 0.09 | 1.22 |
| 4   | 2.00    | 0.01  | -0.01 | -0.02 | 3.80    | 0.01  | 0.00  | 0.05  | 4.23   | 0.07 | 0.06 | 1.35 |
| TS1 | 2.72    | -0.26 | -0.65 | 0.05  | 4.14    | -0.26 | -0.66 | 0.48  | 4.17   | 0.32 | 0.68 | 0.53 |
| TS2 | 2.13    | -0.01 | -0.13 | -0.02 | 3.92    | -0.04 | -0.30 | 0.26  | 4.23   | 0.08 | 0.22 | 1.17 |
| TS3 | 2.87    | -0.06 | -0.30 | -0.58 | 4.11    | 0.27  | -0.02 | -0.56 | 4.10   | 0.39 | 0.32 | 0.99 |
| TS4 | 2.73    | -0.03 | -0.04 | -0.73 | 4.03    | 0.07  | 0.00  | -0.32 | 4.21   | 0.12 | 0.06 | 1.30 |

## Optimized structures in triplet state

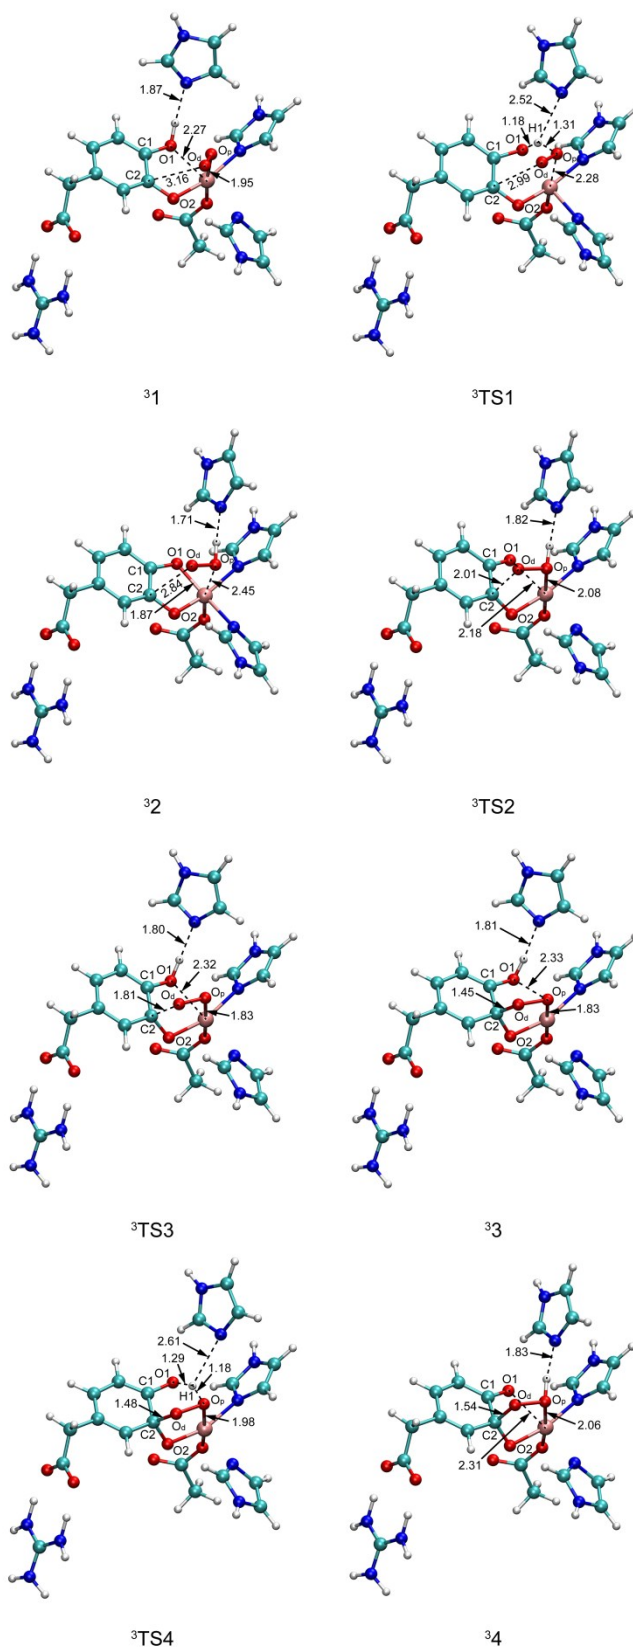

Figure S3 Calculated key structural parameters of intermediates and transition states for QM region in triplet state. Bond lengths (Å) are shown in the frame.

## Optimized structures in septet state

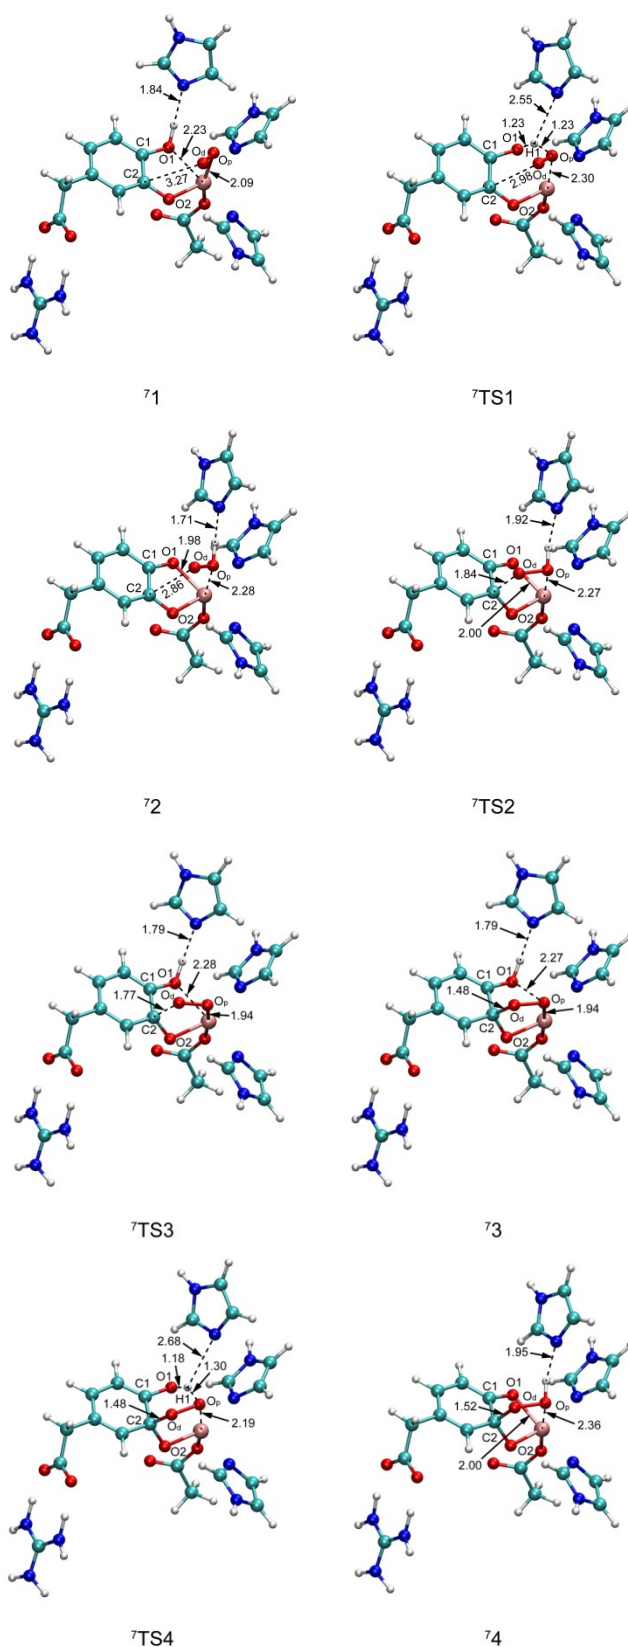

Figure S4 Calculated key structural parameters of intermediates and transition states for QM region in septet state. Bond lengths (Å) are shown in the frame.

## Cartesian Coordinates for QM Region

Triplet state

|           |            |            |            |             |            |            |            |
|-----------|------------|------------|------------|-------------|------------|------------|------------|
| <b>31</b> |            |            |            | H           | 44.4067140 | 48.6483100 | 36.9099420 |
| C         | 40.2700580 | 38.7321880 | 37.8579880 | C           | 41.8273340 | 46.4262890 | 36.7718110 |
| N         | 41.1400330 | 38.7091520 | 36.7860670 | H           | 40.9798890 | 47.1023600 | 36.8359830 |
| H         | 41.8284430 | 37.9731380 | 36.5721150 | C           | 41.5812090 | 45.0663120 | 36.5519510 |
| C         | 41.1221330 | 39.9350810 | 36.2072420 | O           | 40.3311440 | 44.6211800 | 36.3690060 |
| H         | 41.7484530 | 40.1962810 | 35.3683130 | C           | 42.6876320 | 44.1856400 | 36.5305340 |
| N         | 40.2610400 | 40.7248690 | 36.8291960 | O           | 42.3940780 | 42.8362720 | 36.3614040 |
| C         | 39.7182300 | 39.9859460 | 37.8599190 | H           | 42.9273930 | 42.2788850 | 36.9937380 |
| H         | 38.9999510 | 40.4131890 | 38.5427400 | C           | 43.9792260 | 44.6746380 | 36.5999660 |
| C         | 43.9892430 | 39.8882720 | 40.1003560 | H           | 44.8141890 | 43.9794900 | 36.5365060 |
| N         | 45.0515760 | 40.7650680 | 40.0334060 | C           | 44.2031650 | 46.0468720 | 36.7504400 |
| H         | 45.8171090 | 40.8326380 | 40.6934680 | H           | 45.2217720 | 46.4205230 | 36.7799460 |
| C         | 44.8614970 | 41.5624140 | 38.9495500 | O           | 40.3964920 | 42.8976580 | 38.3824030 |
| H         | 45.5247870 | 42.3791400 | 38.7140690 | O           | 39.9313470 | 43.9259490 | 38.9948950 |
| N         | 43.7532770 | 41.2437120 | 38.3110530 | H           | 40.1236528 | 37.8974772 | 38.5380427 |
| C         | 43.1983610 | 40.2016350 | 39.0285490 | H           | 43.8409542 | 39.1953111 | 40.9296919 |
| H         | 42.2744030 | 39.7386980 | 38.7287170 | H           | 34.6330104 | 43.4166575 | 35.9290923 |
| C         | 35.6567350 | 43.4793880 | 36.2967830 | H           | 39.1430868 | 51.9625316 | 32.0828754 |
| N         | 36.1601260 | 44.5620960 | 36.9895140 | H           | 38.0739913 | 42.5614404 | 32.6603637 |
| H         | 35.6423270 | 45.3840960 | 37.3061130 |             |            |            |            |
| C         | 37.4719710 | 44.3244170 | 37.2440510 | <b>3TS1</b> |            |            |            |
| H         | 38.1045860 | 45.0134600 | 37.7801040 | C           | 40.0855630 | 38.9026680 | 37.6610350 |
| N         | 37.8424060 | 43.1541800 | 36.7529080 | N           | 40.9811050 | 38.9207170 | 36.6135590 |
| C         | 36.7149240 | 42.6209390 | 36.1579520 | H           | 41.7154470 | 38.2228640 | 36.4334420 |
| H         | 36.7324160 | 41.6613810 | 35.6640230 | C           | 40.9162010 | 40.1362250 | 36.0290530 |
| N         | 40.1116680 | 52.1120100 | 32.3894700 | H           | 41.5479390 | 40.4279590 | 35.2067280 |
| H         | 40.7192720 | 52.3623450 | 31.6183700 | N           | 39.9849930 | 40.8784740 | 36.6113790 |
| C         | 40.7211460 | 51.3179370 | 33.3457900 | C           | 39.4567580 | 40.1177360 | 37.6366960 |
| N         | 40.0863090 | 51.0195010 | 34.4777400 | H           | 38.7105860 | 40.5152600 | 38.3058400 |
| H         | 40.5735230 | 50.4759170 | 35.2574900 | C           | 43.5843710 | 39.5683210 | 40.3173360 |
| H         | 39.2501620 | 51.5362210 | 34.7169150 | N           | 44.4391310 | 39.9898410 | 39.3194220 |
| N         | 41.9617670 | 50.9117410 | 33.1478740 | H           | 45.4298570 | 39.8112930 | 39.2461870 |
| H         | 42.4538790 | 50.3159090 | 33.9307200 | C           | 43.6749790 | 40.5851350 | 38.3585540 |
| H         | 42.3557380 | 51.0094840 | 32.2120520 | H           | 44.0965370 | 40.9822220 | 37.4444350 |
| C         | 39.1256210 | 42.8056600 | 32.3644340 | N           | 42.4052780 | 40.5962740 | 38.6946240 |
| H         | 39.5322130 | 41.9529970 | 31.8063040 | C           | 42.3371820 | 39.9696200 | 39.9185370 |
| H         | 39.1276930 | 43.6665200 | 31.6894270 | H           | 41.3972610 | 39.8539110 | 40.4415640 |
| C         | 40.0965360 | 43.1063300 | 33.5222510 | C           | 35.6839360 | 43.4985600 | 36.2779200 |
| O         | 39.8304430 | 42.4484890 | 34.6329950 | N           | 36.1743270 | 44.4788490 | 37.1187590 |
| O         | 41.0471570 | 43.8609170 | 33.3541840 | H           | 35.6544760 | 45.2654180 | 37.5135640 |
| Fe        | 40.1307500 | 42.7711950 | 36.4579190 | C           | 37.4950820 | 44.2601630 | 37.3074710 |
| C         | 43.1277020 | 46.9304870 | 36.8587520 | H           | 38.1236480 | 44.8588130 | 37.9487280 |
| C         | 43.3493440 | 48.4162690 | 37.0746010 | N           | 37.8817220 | 43.1890370 | 36.6291610 |
| C         | 42.5096470 | 49.2651230 | 36.1115950 | C           | 36.7579520 | 42.7034920 | 35.9849940 |
| O         | 42.9926310 | 49.4127280 | 34.9531180 | H           | 36.7931400 | 41.8305230 | 35.3540270 |
| O         | 41.4070550 | 49.7261600 | 36.5133880 | N           | 40.0986520 | 52.2094220 | 32.3538400 |
| H         | 43.1007460 | 48.6911660 | 38.1060720 | H           | 40.7040740 | 52.4684080 | 31.5838340 |

|                      |            |            |            |    |            |            |            |
|----------------------|------------|------------|------------|----|------------|------------|------------|
| C                    | 40.7076510 | 51.4022550 | 33.2985490 | C  | 39.5140800 | 40.0755160 | 37.6104670 |
| N                    | 40.0785670 | 51.0998620 | 34.4315910 | H  | 38.7127050 | 40.4525080 | 38.2272350 |
| H                    | 40.5632610 | 50.5480540 | 35.2102960 | C  | 43.3110280 | 39.6255170 | 40.3714710 |
| H                    | 39.2496220 | 51.6251100 | 34.6774550 | N  | 43.9332900 | 39.9820860 | 39.1884410 |
| N                    | 41.9423730 | 50.9837700 | 33.0840960 | H  | 44.7963060 | 39.6093970 | 38.8133400 |
| H                    | 42.4305160 | 50.3859080 | 33.8511500 | C  | 43.0837200 | 40.7978360 | 38.5040570 |
| H                    | 42.3304570 | 51.0831130 | 32.1449960 | H  | 43.3045280 | 41.2208040 | 37.5339620 |
| C                    | 39.0756830 | 42.9331540 | 32.1518140 | N  | 41.9760440 | 41.0002780 | 39.1915010 |
| H                    | 39.4898850 | 42.1098900 | 31.5571610 | C  | 42.1056130 | 40.2729340 | 40.3514690 |
| H                    | 39.0386980 | 43.8148430 | 31.5055090 | H  | 41.3291080 | 40.2656400 | 41.1036820 |
| C                    | 40.0670380 | 43.2045360 | 33.2972330 | C  | 35.7339920 | 43.4776510 | 36.2497700 |
| O                    | 39.7973430 | 42.5527990 | 34.4083150 | N  | 36.2422080 | 44.4550450 | 37.0833500 |
| O                    | 41.0449240 | 43.9234840 | 33.1286540 | H  | 35.7328990 | 45.2472700 | 37.4800390 |
| Fe                   | 39.9083350 | 42.8812990 | 36.2777790 | C  | 37.5610380 | 44.2186550 | 37.2622240 |
| C                    | 42.9194150 | 46.9308380 | 36.8500490 | H  | 38.2062500 | 44.8364220 | 37.8662050 |
| C                    | 43.2588860 | 48.4037200 | 36.9992390 | N  | 37.9323690 | 43.1397750 | 36.5860510 |
| C                    | 42.4524460 | 49.2918680 | 36.0457970 | C  | 36.7972210 | 42.6693220 | 35.9503070 |
| O                    | 42.9329940 | 49.4341360 | 34.8880480 | H  | 36.8199590 | 41.7987780 | 35.3152820 |
| O                    | 41.3691500 | 49.7889080 | 36.4610590 | N  | 40.1351310 | 52.0661100 | 32.3927630 |
| H                    | 43.0744790 | 48.7258380 | 38.0309600 | H  | 40.7443250 | 52.2952110 | 31.6164250 |
| H                    | 44.3237740 | 48.5478000 | 36.7894650 | C  | 40.7347560 | 51.2740680 | 33.3573650 |
| C                    | 41.5881920 | 46.5230360 | 36.6873560 | N  | 40.0967830 | 50.9931080 | 34.4919820 |
| H                    | 40.7964460 | 47.2641670 | 36.6351370 | H  | 40.5775780 | 50.4523460 | 35.2769020 |
| C                    | 41.2908210 | 45.1684450 | 36.5475280 | H  | 39.2625170 | 51.5159340 | 34.7243620 |
| O                    | 40.0451620 | 44.7047970 | 36.2747110 | N  | 41.9685410 | 50.8465590 | 33.1634710 |
| C                    | 42.3066150 | 44.2186660 | 36.7166800 | H  | 42.4671780 | 50.2796550 | 33.9610060 |
| O                    | 41.8608900 | 42.9044940 | 36.7831140 | H  | 42.3782570 | 50.9606600 | 32.2361480 |
| H                    | 41.3923200 | 42.7478600 | 37.8549140 | C  | 39.0136200 | 42.9139560 | 32.0706520 |
| C                    | 43.6266300 | 44.6003130 | 36.8589290 | H  | 39.4371380 | 42.0962110 | 31.4751420 |
| H                    | 44.4044840 | 43.8467720 | 36.9693930 | H  | 38.9768200 | 43.7993860 | 31.4293940 |
| C                    | 43.9303420 | 45.9662310 | 36.8969910 | C  | 39.9882920 | 43.1814780 | 33.2325150 |
| H                    | 44.9665900 | 46.2778600 | 36.9982960 | O  | 39.6784640 | 42.5470840 | 34.3370300 |
| O                    | 40.2738180 | 42.8504510 | 38.5252880 | O  | 40.9748780 | 43.8957660 | 33.0728340 |
| O                    | 40.1685490 | 44.0542050 | 39.0886530 | Fe | 39.9838030 | 42.8666280 | 36.2139830 |
| H                    | 40.0080116 | 38.0775726 | 38.3657916 | C  | 42.9510170 | 46.8609930 | 36.9407020 |
| H                    | 43.8995401 | 39.0383590 | 41.2102972 | C  | 43.3060420 | 48.3291440 | 37.1100650 |
| H                    | 34.6532946 | 43.4561048 | 35.9249134 | C  | 42.5053880 | 49.2200150 | 36.1499080 |
| H                    | 39.1301023 | 52.0600871 | 32.0480962 | O  | 43.0123370 | 49.3897720 | 35.0060730 |
| H                    | 38.0398325 | 42.6527749 | 32.4713981 | O  | 41.4025070 | 49.6915710 | 36.5414720 |
|                      |            |            |            | H  | 43.1156980 | 48.6601540 | 38.1378600 |
| <b><sup>32</sup></b> |            |            |            | H  | 44.3715240 | 48.4703640 | 36.9027810 |
| C                    | 40.1656430 | 38.8734230 | 37.6839900 | C  | 41.6107290 | 46.4758190 | 36.8176800 |
| N                    | 41.1210430 | 38.9081150 | 36.6914970 | H  | 40.8224940 | 47.2222030 | 36.8334960 |
| H                    | 41.8370390 | 38.1928090 | 36.5046860 | C  | 41.2995230 | 45.1388940 | 36.5877370 |
| C                    | 41.0516580 | 40.1147530 | 36.0817900 | O  | 40.0567630 | 44.6956550 | 36.3080240 |
| H                    | 41.7156230 | 40.4118240 | 35.2871620 | C  | 42.3014890 | 44.1468810 | 36.5726570 |
| N                    | 40.0855730 | 40.8458350 | 36.6166430 | O  | 41.8429990 | 42.8911840 | 36.3961580 |

|                        |            |            |            |                        |            |            |            |
|------------------------|------------|------------|------------|------------------------|------------|------------|------------|
| H                      | 40.8330600 | 42.2343130 | 38.8774430 | C                      | 39.0571690 | 42.9038320 | 32.1254880 |
| C                      | 43.6336520 | 44.5205220 | 36.7210960 | H                      | 39.4608640 | 42.0844820 | 31.5176880 |
| H                      | 44.4196700 | 43.7666870 | 36.6937860 | H                      | 39.0271940 | 43.7979090 | 31.4957630 |
| C                      | 43.9469050 | 45.8756160 | 36.8814920 | C                      | 40.0447930 | 43.1355230 | 33.2863020 |
| H                      | 44.9912600 | 46.1685500 | 36.9695400 | O                      | 39.8162080 | 42.3673860 | 34.3188860 |
| O                      | 40.1034460 | 42.9142980 | 38.6623710 | O                      | 40.9744720 | 43.9346440 | 33.1659160 |
| O                      | 40.5253310 | 44.1101210 | 39.1199290 | Fe                     | 40.0260390 | 42.7297790 | 36.1725310 |
| H                      | 40.0717738 | 38.0561716 | 38.3948786 | C                      | 42.8012750 | 46.8695240 | 37.0591740 |
| H                      | 43.7820056 | 39.0980336 | 41.1963246 | C                      | 43.1362000 | 48.3418150 | 37.2170460 |
| H                      | 34.7002625 | 43.4531366 | 35.9043678 | C                      | 42.3805510 | 49.2163010 | 36.2051890 |
| H                      | 39.1634164 | 51.9286517 | 32.0889048 | O                      | 42.9531870 | 49.3846340 | 35.0961020 |
| H                      | 37.9780395 | 42.6281007 | 32.3859377 | O                      | 41.2542590 | 49.6722040 | 36.5426840 |
| <b><sup>3</sup>TS2</b> |            |            |            | H                      | 42.9108520 | 48.6816560 | 38.2336560 |
| C                      | 40.1913370 | 38.8310460 | 37.6797070 | H                      | 44.2092500 | 48.4831210 | 37.0526860 |
| N                      | 41.1126040 | 38.8186430 | 36.6560640 | C                      | 41.5296090 | 46.4231550 | 36.8673240 |
| H                      | 41.8284060 | 38.1013610 | 36.4835970 | H                      | 40.6970460 | 47.1191290 | 36.8316560 |
| C                      | 41.0428970 | 40.0133950 | 36.0159940 | C                      | 41.2515210 | 45.0149600 | 36.6263510 |
| H                      | 41.6760780 | 40.2721860 | 35.1840430 | O                      | 40.1651280 | 44.6405900 | 36.0492310 |
| N                      | 40.1112310 | 40.7798890 | 36.5631250 | C                      | 42.4088090 | 44.0697370 | 36.5965660 |
| C                      | 39.5609180 | 40.0440120 | 37.5958840 | O                      | 42.1922520 | 42.8890090 | 36.2274100 |
| H                      | 38.7797400 | 40.4479470 | 38.2217380 | H                      | 40.9678450 | 42.3703090 | 38.5217720 |
| C                      | 43.3453260 | 39.6349910 | 40.2793930 | C                      | 43.7153410 | 44.5814200 | 36.9064140 |
| N                      | 44.0207640 | 39.9422030 | 39.1118970 | H                      | 44.5525540 | 43.8867330 | 36.9139730 |
| H                      | 44.8740830 | 39.5203570 | 38.7689620 | C                      | 43.8937170 | 45.9167220 | 37.0811250 |
| C                      | 43.2197580 | 40.7636510 | 38.3769740 | H                      | 44.8982700 | 46.3029280 | 37.2367530 |
| H                      | 43.4891860 | 41.1410450 | 37.3998880 | O                      | 40.3118700 | 43.0614070 | 38.2050790 |
| N                      | 42.0975280 | 41.0259980 | 39.0170340 | O                      | 40.9302530 | 44.3211370 | 38.4885670 |
| C                      | 42.1631930 | 40.3237590 | 40.1999720 | H                      | 40.0857387 | 38.0229402 | 38.3988856 |
| H                      | 41.3612710 | 40.3590210 | 40.9255270 | H                      | 43.7752672 | 39.1094816 | 41.1296195 |
| C                      | 35.5664600 | 43.4683460 | 36.1820780 | H                      | 34.5270965 | 43.4214642 | 35.8625337 |
| N                      | 36.1103350 | 44.5182320 | 36.8944500 | H                      | 39.1594767 | 51.9516336 | 32.0680904 |
| H                      | 35.6165260 | 45.3364070 | 37.2566990 | H                      | 38.0195711 | 42.6270346 | 32.4455781 |
| C                      | 37.4268810 | 44.2477580 | 37.0928980 | <b><sup>3</sup>TS3</b> |            |            |            |
| H                      | 38.0849870 | 44.9142360 | 37.6284690 | C                      | 40.1774840 | 38.8266900 | 37.8005780 |
| N                      | 37.7598730 | 43.0912580 | 36.5477800 | N                      | 41.0333680 | 38.8237470 | 36.7191430 |
| C                      | 36.6042160 | 42.5994420 | 35.9743260 | H                      | 41.7500400 | 38.1125860 | 36.5134510 |
| H                      | 36.5869210 | 41.6581630 | 35.4462790 | C                      | 40.9471190 | 40.0343590 | 36.1157040 |
| N                      | 40.1327660 | 52.0632150 | 32.3754580 | H                      | 41.5393700 | 40.3067830 | 35.2570580 |
| H                      | 40.7529860 | 52.2887590 | 31.6069240 | N                      | 40.0671050 | 40.8004840 | 36.7396370 |
| C                      | 40.7030610 | 51.2685240 | 33.3505840 | C                      | 39.5766290 | 40.0585830 | 37.7947660 |
| N                      | 40.0397130 | 50.9825210 | 34.4674180 | H                      | 38.8478350 | 40.4647470 | 38.4794710 |
| H                      | 40.4950390 | 50.4326850 | 35.2622040 | C                      | 43.8503910 | 39.8111450 | 40.0624480 |
| H                      | 39.1923360 | 51.4940260 | 34.6768670 | N                      | 44.9621740 | 40.3798210 | 39.4742340 |
| N                      | 41.9437190 | 50.8430290 | 33.1804690 | H                      | 45.9164990 | 40.3082910 | 39.7957100 |
| H                      | 42.4257540 | 50.2923600 | 33.9750250 | C                      | 44.5467620 | 41.0557390 | 38.3736690 |
| H                      | 42.3798690 | 50.9606290 | 32.2670310 | H                      | 45.2257300 | 41.5411890 | 37.6897160 |



|    |            |            |            |           |            |            |            |
|----|------------|------------|------------|-----------|------------|------------|------------|
| N  | 43.2394960 | 40.9840070 | 38.2369410 | H         | 40.0676929 | 37.9875852 | 38.4832119 |
| C  | 42.7905370 | 40.2131900 | 39.2936990 | H         | 43.8954826 | 39.2033392 | 40.9677985 |
| H  | 41.7425970 | 40.0025150 | 39.4239080 | H         | 34.4696977 | 43.4419962 | 35.8635929 |
| C  | 35.5076720 | 43.5172000 | 36.1807520 | H         | 39.1591458 | 51.9593702 | 32.0604588 |
| N  | 36.0238650 | 44.5698570 | 36.9105830 | H         | 38.0267884 | 42.5847962 | 32.5430629 |
| H  | 35.5133110 | 45.3768450 | 37.2739740 |           |            |            |            |
| C  | 37.3445830 | 44.3390450 | 37.1086310 | <b>33</b> |            |            |            |
| H  | 37.9920320 | 45.0087010 | 37.6559290 | C         | 40.1689850 | 38.8498070 | 37.7953570 |
| N  | 37.7027870 | 43.1992580 | 36.5413410 | N         | 41.0300720 | 38.8479570 | 36.7181070 |
| C  | 36.5663280 | 42.6803590 | 35.9567680 | H         | 41.7463880 | 38.1360670 | 36.5133650 |
| H  | 36.5782880 | 41.7470280 | 35.4150950 | C         | 40.9494320 | 40.0591000 | 36.1165700 |
| N  | 40.1330450 | 52.0698810 | 32.3667740 | H         | 41.5543340 | 40.3293960 | 35.2661480 |
| H  | 40.7537910 | 52.2800650 | 31.5941500 | N         | 40.0669730 | 40.8264540 | 36.7364060 |
| C  | 40.6981790 | 51.2701590 | 33.3437610 | C         | 39.5703900 | 40.0831680 | 37.7885130 |
| N  | 40.0321030 | 50.9940510 | 34.4616910 | H         | 38.8374210 | 40.4875780 | 38.4699060 |
| H  | 40.4930290 | 50.4496430 | 35.2629070 | C         | 43.8448110 | 39.7930080 | 40.1483780 |
| H  | 39.1948050 | 51.5216840 | 34.6708680 | N         | 44.9366110 | 40.3954700 | 39.5563330 |
| N  | 41.9321980 | 50.8283020 | 33.1738870 | H         | 45.8928540 | 40.3573930 | 39.8785030 |
| H  | 42.4122560 | 50.2698760 | 33.9771340 | C         | 44.4954710 | 41.0572300 | 38.4562440 |
| H  | 42.3694410 | 50.9470570 | 32.2608060 | H         | 45.1543980 | 41.5738090 | 37.7751630 |
| C  | 39.0781250 | 42.8263570 | 32.2443130 | N         | 43.1914180 | 40.9374290 | 38.3213310 |
| H  | 39.4763670 | 41.9811660 | 31.6690130 | C         | 42.7706780 | 40.1584370 | 39.3829670 |
| H  | 39.0846830 | 43.7007800 | 31.5869780 | H         | 41.7314100 | 39.9087890 | 39.5138650 |
| C  | 40.0526910 | 43.0839300 | 33.4120110 | C         | 35.4907220 | 43.5143980 | 36.1615690 |
| O  | 39.7629200 | 42.3942160 | 34.4980340 | N         | 36.0021530 | 44.5701930 | 36.8893650 |
| O  | 41.0232790 | 43.8165200 | 33.2552110 | H         | 35.4884240 | 45.3753190 | 37.2518200 |
| Fe | 39.8763320 | 42.8462330 | 36.3302250 | C         | 37.3241110 | 44.3442890 | 37.0866980 |
| C  | 42.8514980 | 46.9121900 | 37.0785610 | H         | 37.9632530 | 45.0200270 | 37.6345080 |
| C  | 43.1370080 | 48.3980240 | 37.2241760 | N         | 37.6886450 | 43.2063810 | 36.5212150 |
| C  | 42.3772360 | 49.2437880 | 36.1961060 | C         | 36.5537020 | 42.6822360 | 35.9384010 |
| O  | 42.9406210 | 49.3855710 | 35.0761880 | H         | 36.5694250 | 41.7483980 | 35.3977030 |
| O  | 41.2545830 | 49.7159960 | 36.5277550 | N         | 40.1128130 | 52.1062010 | 32.3729230 |
| H  | 42.8806730 | 48.7375470 | 38.2330880 | H         | 40.7335270 | 52.3254990 | 31.6026340 |
| H  | 44.2084950 | 48.5690330 | 37.0782910 | C         | 40.6802140 | 51.2954660 | 33.3400040 |
| C  | 41.5688620 | 46.4357000 | 36.9123700 | N         | 40.0208860 | 51.0175880 | 34.4609390 |
| H  | 40.7302720 | 47.1237710 | 36.8688870 | H         | 40.4797420 | 50.4617110 | 35.2565660 |
| C  | 41.2805430 | 45.0186640 | 36.7514970 | H         | 39.1908090 | 51.5530900 | 34.6791510 |
| O  | 40.2560230 | 44.6431050 | 35.9714680 | N         | 41.9074180 | 50.8411400 | 33.1547950 |
| C  | 42.4633760 | 44.1431500 | 36.7340420 | H         | 42.3947370 | 50.2892840 | 33.9519350 |
| O  | 42.1984010 | 42.8376440 | 36.4131000 | H         | 42.3388380 | 50.9656350 | 32.2381250 |
| H  | 42.5573750 | 42.1921520 | 37.0904240 | C         | 39.0766090 | 42.8432200 | 32.2457250 |
| C  | 43.7334340 | 44.6306760 | 36.9247060 | H         | 39.4778150 | 41.9997740 | 31.6699290 |
| H  | 44.5819240 | 43.9489690 | 36.8934640 | H         | 39.0802960 | 43.7175530 | 31.5881440 |
| C  | 43.9370910 | 46.0052500 | 37.0873670 | C         | 40.0524790 | 43.1036340 | 33.4123250 |
| H  | 44.9496470 | 46.3827020 | 37.1885180 | O         | 39.7528400 | 42.4272180 | 34.5049420 |
| O  | 40.1434790 | 43.2125780 | 38.1046060 | O         | 41.0307660 | 43.8231260 | 33.2490950 |
| O  | 40.5160450 | 44.5494130 | 38.3288770 | Fe        | 39.8978480 | 42.8796840 | 36.3298820 |

|                        |            |            |            |           |            |            |            |
|------------------------|------------|------------|------------|-----------|------------|------------|------------|
| C                      | 42.8395970 | 46.9179380 | 37.0575350 | H         | 38.0253080 | 45.1330000 | 37.6306500 |
| C                      | 43.1250900 | 48.4049970 | 37.1964310 | N         | 37.7762820 | 43.3014090 | 36.5376570 |
| C                      | 42.3556790 | 49.2477310 | 36.1731130 | C         | 36.6438870 | 42.7445200 | 35.9773480 |
| O                      | 42.9117780 | 49.3874700 | 35.0495620 | H         | 36.6719060 | 41.8041420 | 35.4486470 |
| O                      | 41.2372880 | 49.7222420 | 36.5156290 | N         | 40.0867140 | 52.2296520 | 32.3473530 |
| H                      | 42.8741850 | 48.7436370 | 38.2063190 | H         | 40.7049750 | 52.4616170 | 31.5790710 |
| H                      | 44.1942100 | 48.5795350 | 37.0408460 | C         | 40.6589550 | 51.4048310 | 33.3001950 |
| C                      | 41.5591160 | 46.4284630 | 37.0955990 | N         | 40.0020010 | 51.1178230 | 34.4211540 |
| H                      | 40.7125710 | 47.1013960 | 37.1942470 | H         | 40.4638590 | 50.5603610 | 35.2135920 |
| C                      | 41.2351640 | 44.9641180 | 37.0044980 | H         | 39.1857020 | 51.6689380 | 34.6520760 |
| O                      | 40.3172630 | 44.6397040 | 36.0056850 | N         | 41.8834950 | 50.9495640 | 33.1041310 |
| C                      | 42.4839330 | 44.1188920 | 36.7920960 | H         | 42.3535840 | 50.3553540 | 33.8854190 |
| O                      | 42.2217410 | 42.8036110 | 36.4756770 | H         | 42.2984260 | 51.0548950 | 32.1772460 |
| H                      | 42.4957750 | 42.1715610 | 37.1991580 | C         | 39.0822590 | 42.9119990 | 32.1836520 |
| C                      | 43.7373870 | 44.6463790 | 36.7251960 | H         | 39.4889150 | 42.0783360 | 31.5980870 |
| H                      | 44.5819020 | 43.9894160 | 36.5241400 | H         | 39.0502120 | 43.7864070 | 31.5275650 |
| C                      | 43.9369320 | 46.0324110 | 36.8845560 | C         | 40.0850250 | 43.1953970 | 33.3165660 |
| H                      | 44.9455260 | 46.4328230 | 36.8373340 | O         | 39.8417840 | 42.5014230 | 34.4184580 |
| O                      | 40.0745920 | 43.2716410 | 38.1042700 | O         | 41.0478250 | 43.9250950 | 33.1348480 |
| O                      | 40.5956280 | 44.6411420 | 38.2649080 | Fe        | 39.9301070 | 42.8886660 | 36.2253530 |
| H                      | 40.0593894 | 38.0102447 | 38.4783717 | C         | 42.8313080 | 46.9843340 | 36.9650830 |
| H                      | 43.9109054 | 39.1771222 | 41.0451613 | C         | 43.1062670 | 48.4720250 | 37.1018380 |
| H                      | 34.4516886 | 43.4345823 | 35.8494178 | C         | 42.3191190 | 49.3151610 | 36.0943610 |
| H                      | 39.1408267 | 51.9896482 | 32.0631118 | O         | 42.8376170 | 49.4224110 | 34.9487140 |
| H                      | 38.0261578 | 42.5982823 | 32.5445705 | O         | 41.2263460 | 49.8236730 | 36.4686170 |
|                        |            |            |            | H         | 42.8649980 | 48.8014550 | 38.1172840 |
| <b><sup>3</sup>TS4</b> |            |            |            | H         | 44.1721950 | 48.6543630 | 36.9343040 |
| C                      | 40.1120790 | 38.9039790 | 37.6724650 | C         | 41.5580160 | 46.4873870 | 37.0568380 |
| N                      | 41.0250180 | 38.9184580 | 36.6415600 | H         | 40.7079960 | 47.1536530 | 37.1727580 |
| H                      | 41.7548980 | 38.2139830 | 36.4661140 | C         | 41.2778620 | 45.0270020 | 36.9820170 |
| C                      | 40.9631660 | 40.1278680 | 36.0420970 | O         | 40.3936060 | 44.6394810 | 35.9641850 |
| H                      | 41.5978550 | 40.4080720 | 35.2178940 | C         | 42.5270260 | 44.1696580 | 36.8828050 |
| N                      | 40.0304200 | 40.8789630 | 36.6121860 | O         | 42.2700140 | 42.8725950 | 36.9406670 |
| C                      | 39.4917030 | 40.1232850 | 37.6368030 | H         | 41.3496910 | 42.8349330 | 37.8468670 |
| H                      | 38.7300550 | 40.5133720 | 38.2945720 | C         | 43.7792220 | 44.7239350 | 36.7143260 |
| C                      | 43.5018920 | 39.5398700 | 40.4359710 | H         | 44.6344680 | 44.0598980 | 36.6163590 |
| N                      | 44.2951610 | 40.0080280 | 39.4091600 | C         | 43.9404320 | 46.1089520 | 36.7646380 |
| H                      | 45.2833610 | 39.8472020 | 39.2783940 | H         | 44.9357970 | 46.5349480 | 36.6748220 |
| C                      | 43.4758090 | 40.6405640 | 38.5203660 | O         | 40.2854420 | 43.2437080 | 38.1395020 |
| H                      | 43.8351630 | 41.1146570 | 37.6179790 | O         | 40.5977290 | 44.6899040 | 38.2516380 |
| N                      | 42.2254970 | 40.6270220 | 38.9291260 | H         | 40.0260690 | 38.0825544 | 38.3807513 |
| C                      | 42.2305130 | 39.9398220 | 40.1220410 | H         | 43.8744197 | 39.0016651 | 41.2993245 |
| H                      | 41.3239620 | 39.7883130 | 40.6945820 | H         | 34.5309841 | 43.4641578 | 35.8825434 |
| C                      | 35.5667520 | 43.5569100 | 36.2049680 | H         | 39.1172834 | 52.1030529 | 32.0350925 |
| N                      | 36.0660640 | 44.6311700 | 36.9138160 | H         | 38.0448594 | 42.6422899 | 32.5068208 |
| H                      | 35.5400930 | 45.4284550 | 37.2780140 |           |            |            |            |
| C                      | 37.3945770 | 44.4393360 | 37.0944830 | <b>34</b> |            |            |            |

|    |            |            |            |   |            |            |            |
|----|------------|------------|------------|---|------------|------------|------------|
| C  | 40.1677340 | 38.8387420 | 37.6683330 | C | 41.5385140 | 46.3731940 | 37.1539450 |
| N  | 41.0743640 | 38.8391320 | 36.6311370 | H | 40.6848350 | 47.0252080 | 37.3171020 |
| H  | 41.7984100 | 38.1320390 | 36.4524960 | C | 41.2225840 | 44.9151240 | 36.9358450 |
| C  | 40.9759150 | 40.0348650 | 35.9913230 | O | 40.1928420 | 44.6822830 | 36.1269110 |
| H  | 41.5888900 | 40.3035250 | 35.1472390 | C | 42.4535150 | 44.0546500 | 36.5722800 |
| N  | 40.0418330 | 40.7898970 | 36.5530520 | O | 42.2576580 | 42.8697120 | 36.2619560 |
| C  | 39.5200130 | 40.0426950 | 37.5937480 | H | 40.9997150 | 42.4643340 | 38.5226670 |
| H  | 38.7393460 | 40.4307920 | 38.2305630 | C | 43.7686270 | 44.6480900 | 36.5937410 |
| C  | 43.3105760 | 39.6456190 | 40.2435970 | H | 44.6194020 | 44.0030110 | 36.3937450 |
| N  | 43.9836290 | 39.9421450 | 39.0719410 | C | 43.9107980 | 45.9730910 | 36.8289030 |
| H  | 44.8230080 | 39.5003890 | 38.7191720 | H | 44.9091060 | 46.4075860 | 36.8158660 |
| C  | 43.1964510 | 40.7824740 | 38.3448870 | O | 40.2979550 | 43.1132580 | 38.2051000 |
| H  | 43.4686150 | 41.1519150 | 37.3657480 | O | 40.8982360 | 44.4484360 | 38.3621180 |
| N  | 42.0837870 | 41.0689080 | 38.9929470 | H | 40.0759221 | 38.0274193 | 38.3859523 |
| C  | 42.1415210 | 40.3584280 | 40.1729070 | H | 43.7432014 | 39.1236552 | 41.0956137 |
| H  | 41.3450610 | 40.4066390 | 40.9035260 | H | 34.4961689 | 43.4033930 | 35.8580318 |
| C  | 35.5334570 | 43.4722570 | 36.1798940 | H | 39.1506274 | 51.9431103 | 32.0725689 |
| N  | 36.0628510 | 44.5601700 | 36.8441350 | H | 38.0440256 | 42.6327151 | 32.4615260 |
| H  | 35.5557150 | 45.3776020 | 37.1880430 |   |            |            |            |
| C  | 37.3852140 | 44.3235740 | 37.0433060 |   |            |            |            |
| H  | 38.0326020 | 45.0306520 | 37.5366340 |   |            |            |            |
| N  | 37.7361050 | 43.1511740 | 36.5450020 |   |            |            |            |
| C  | 36.5855000 | 42.6139600 | 36.0020180 |   |            |            |            |
| H  | 36.5832370 | 41.6512540 | 35.5141290 |   |            |            |            |
| N  | 40.1222300 | 52.0603520 | 32.3820090 |   |            |            |            |
| H  | 40.7445360 | 52.2885500 | 31.6160710 |   |            |            |            |
| C  | 40.6919970 | 51.2736330 | 33.3634630 |   |            |            |            |
| N  | 40.0223350 | 50.9825190 | 34.4747450 |   |            |            |            |
| H  | 40.4748740 | 50.4319660 | 35.2721190 |   |            |            |            |
| H  | 39.1647550 | 51.4807500 | 34.6740050 |   |            |            |            |
| N  | 41.9437360 | 50.8727860 | 33.2084310 |   |            |            |            |
| H  | 42.4047980 | 50.2875680 | 33.9935630 |   |            |            |            |
| H  | 42.3741590 | 50.9592230 | 32.2908280 |   |            |            |            |
| C  | 39.0746930 | 42.9290740 | 32.1350570 |   |            |            |            |
| H  | 39.4830980 | 42.1273370 | 31.5067650 |   |            |            |            |
| H  | 39.0238610 | 43.8320250 | 31.5189650 |   |            |            |            |
| C  | 40.0814400 | 43.1597470 | 33.2838310 |   |            |            |            |
| O  | 39.8574970 | 42.4150170 | 34.3298980 |   |            |            |            |
| O  | 41.0275920 | 43.9338790 | 33.1267260 |   |            |            |            |
| Fe | 39.9470700 | 42.7463190 | 36.2040230 |   |            |            |            |
| C  | 42.7909460 | 46.8740840 | 37.0871670 |   |            |            |            |
| C  | 43.0971870 | 48.3543340 | 37.2460170 |   |            |            |            |
| C  | 42.3447900 | 49.2120310 | 36.2156080 |   |            |            |            |
| O  | 42.9206680 | 49.3638490 | 35.1053710 |   |            |            |            |
| O  | 41.2220580 | 49.6770840 | 36.5501530 |   |            |            |            |
| H  | 42.8369760 | 48.6934750 | 38.2524920 |   |            |            |            |
| H  | 44.1693650 | 48.5206660 | 37.1042160 |   |            |            |            |

Quintet state

|           |            |            |            |             |            |            |            |
|-----------|------------|------------|------------|-------------|------------|------------|------------|
| <b>51</b> |            |            |            | H           | 43.2296840 | 48.7587700 | 38.0535890 |
|           |            |            |            | H           | 44.4879550 | 48.6657120 | 36.8084720 |
| C         | 40.3410600 | 38.6752610 | 37.8653160 | C           | 41.8658230 | 46.5032350 | 36.7553590 |
| N         | 41.2169830 | 38.6387360 | 36.7981890 | H           | 41.0354120 | 47.2019940 | 36.7782570 |
| H         | 41.8964500 | 37.8940900 | 36.5864860 | C           | 41.5991040 | 45.1445290 | 36.5765330 |
| C         | 41.2183000 | 39.8659280 | 36.2196230 | O           | 40.3697350 | 44.6845770 | 36.3544620 |
| H         | 41.8488940 | 40.1139130 | 35.3796610 | C           | 42.6738660 | 44.2289510 | 36.6052880 |
| N         | 40.3736650 | 40.6701670 | 36.8405230 | O           | 42.3037750 | 42.8968530 | 36.4610770 |
| C         | 39.8154820 | 39.9397660 | 37.8689960 | H           | 42.8131830 | 42.3129380 | 37.0957840 |
| H         | 39.1137180 | 40.3844190 | 38.5580190 | C           | 43.9785260 | 44.6778280 | 36.6754300 |
| C         | 43.9702310 | 39.9038260 | 40.1152260 | H           | 44.7995640 | 43.9645520 | 36.6403890 |
| N         | 45.0431900 | 40.7655680 | 40.0164090 | C           | 44.2292170 | 46.0520250 | 36.7841680 |
| H         | 45.8293340 | 40.8206950 | 40.6526720 | H           | 45.2561120 | 46.4014230 | 36.8121910 |
| C         | 44.8239450 | 41.5770220 | 38.9488430 | O           | 40.2084370 | 42.8197590 | 38.4635100 |
| H         | 45.4892970 | 42.3863980 | 38.6953240 | O           | 39.8469690 | 43.9353980 | 39.0575370 |
| N         | 43.6870200 | 41.2816730 | 38.3503850 | H           | 40.1721065 | 37.8448494 | 38.5445143 |
| C         | 43.1432020 | 40.2411330 | 39.0787100 | H           | 43.8393379 | 39.2074672 | 40.9451331 |
| H         | 42.1943380 | 39.8064720 | 38.8190980 | H           | 34.6566110 | 43.4586355 | 35.9211053 |
| C         | 35.6838450 | 43.5179970 | 36.2793550 | H           | 39.1407946 | 51.9797850 | 32.0821145 |
| N         | 36.1703630 | 44.5450060 | 37.0652580 | H           | 38.0448643 | 42.5522568 | 32.6053486 |
| H         | 35.6468160 | 45.3458670 | 37.4239380 |             |            |            |            |
| C         | 37.4870170 | 44.3246510 | 37.2877280 | <b>5TS1</b> |            |            |            |
| H         | 38.1187650 | 44.9531580 | 37.8966490 | C           | 40.1878480 | 38.7940790 | 37.6866580 |
| N         | 37.8735300 | 43.2103740 | 36.6845660 | N           | 41.0988330 | 38.7897540 | 36.6524000 |
| C         | 36.7565340 | 42.7007430 | 36.0495860 | H           | 41.8269240 | 38.0831330 | 36.4826370 |
| H         | 36.7963950 | 41.7903340 | 35.4725440 | C           | 41.0393490 | 39.9947090 | 36.0417150 |
| N         | 40.1083340 | 52.1406800 | 32.3862150 | H           | 41.6839440 | 40.2631860 | 35.2203840 |
| H         | 40.7089320 | 52.4053270 | 31.6143960 | N           | 40.1082170 | 40.7519750 | 36.5983560 |
| C         | 40.7342450 | 51.3489130 | 33.3334550 | C           | 39.5692280 | 40.0121780 | 37.6315290 |
| N         | 40.1136640 | 51.0406340 | 34.4706310 | H           | 38.8125500 | 40.4212470 | 38.2828010 |
| H         | 40.6155670 | 50.5039530 | 35.2444300 | C           | 43.5920090 | 39.5829030 | 40.3545940 |
| H         | 39.2761930 | 51.5500390 | 34.7208500 | N           | 44.4490430 | 40.0435920 | 39.3757670 |
| N         | 41.9775500 | 50.9567330 | 33.1223750 | H           | 45.4465080 | 39.8993180 | 39.3193730 |
| H         | 42.4712620 | 50.3437290 | 33.8882660 | C           | 43.6827250 | 40.6425540 | 38.4180660 |
| H         | 42.3562920 | 51.0496950 | 32.1797900 | H           | 44.1033360 | 41.0735040 | 37.5191810 |
| C         | 39.0993490 | 42.7882060 | 32.3162010 | N           | 42.4092580 | 40.6152310 | 38.7378830 |
| H         | 39.4998160 | 41.9367440 | 31.7520000 | C           | 42.3410810 | 39.9616400 | 39.9470280 |
| H         | 39.1136910 | 43.6559530 | 31.6502730 | H           | 41.3977070 | 39.8103790 | 40.4548920 |
| C         | 40.0624740 | 43.0576630 | 33.4876520 | C           | 35.5849380 | 43.5035560 | 36.2134070 |
| O         | 39.7792500 | 42.4070350 | 34.5958060 | N           | 36.0974740 | 44.4695540 | 37.0577350 |
| O         | 41.0315260 | 43.7956490 | 33.3300880 | H           | 35.5930920 | 45.2613390 | 37.4623640 |
| Fe        | 40.0303960 | 42.8414960 | 36.4660790 | C           | 37.4158460 | 44.2264390 | 37.2335950 |
| C         | 43.1785980 | 46.9705110 | 36.8502290 | H           | 38.0605550 | 44.8125960 | 37.8716600 |
| C         | 43.4342630 | 48.4565400 | 37.0195660 | N           | 37.7792840 | 43.1536450 | 36.5448170 |
| C         | 42.5662520 | 49.2923390 | 36.0685040 | C           | 36.6425600 | 42.6950940 | 35.9038310 |
| O         | 43.0055080 | 49.4102940 | 34.8895350 | H           | 36.6541130 | 41.8230470 | 35.2687840 |
| O         | 41.4803340 | 49.7674980 | 36.4986090 | N           | 40.1026280 | 52.2154350 | 32.3476610 |

|           |            |            |            |    |            |            |            |
|-----------|------------|------------|------------|----|------------|------------|------------|
| H         | 40.7072140 | 52.4720340 | 31.5761920 | N  | 40.1912190 | 40.6745420 | 36.6057560 |
| C         | 40.7121760 | 51.4097240 | 33.2933890 | C  | 39.6183110 | 39.9419300 | 37.6241760 |
| N         | 40.0832420 | 51.1087300 | 34.4270780 | H  | 38.8192490 | 40.3438110 | 38.2290000 |
| H         | 40.5719050 | 50.5636630 | 35.2085230 | C  | 43.3387140 | 39.6344600 | 40.3357190 |
| H         | 39.2558730 | 51.6364360 | 34.6730490 | N  | 43.9929110 | 39.9831020 | 39.1675130 |
| N         | 41.9466780 | 50.9907210 | 33.0791360 | H  | 44.8638080 | 39.6055600 | 38.8169600 |
| H         | 42.4364150 | 50.3956040 | 33.8484900 | C  | 43.1604190 | 40.7930900 | 38.4549930 |
| H         | 42.3347740 | 51.0906420 | 32.1401150 | H  | 43.4093760 | 41.2052700 | 37.4866470 |
| C         | 39.0565670 | 42.9436750 | 32.0780500 | N  | 42.0357040 | 41.0027930 | 39.1103880 |
| H         | 39.4604270 | 42.1192950 | 31.4784710 | C  | 42.1349030 | 40.2843280 | 40.2795420 |
| H         | 39.0145460 | 43.8278450 | 31.4361650 | H  | 41.3385630 | 40.2822510 | 41.0117020 |
| C         | 40.0613360 | 43.1994870 | 33.2092940 | C  | 35.6288590 | 43.4947970 | 36.1855000 |
| O         | 39.8214380 | 42.5063660 | 34.3075910 | N  | 36.1635650 | 44.4862760 | 36.9847700 |
| O         | 41.0262070 | 43.9361170 | 33.0555220 | H  | 35.6680590 | 45.2860480 | 37.3837480 |
| Fe        | 39.8886520 | 42.8574020 | 36.1585650 | C  | 37.4835160 | 44.2292910 | 37.1490600 |
| C         | 42.9549720 | 46.9839680 | 36.8793930 | H  | 38.1459430 | 44.8514270 | 37.7312550 |
| C         | 43.2875390 | 48.4592410 | 37.0137990 | N  | 37.8278160 | 43.1287150 | 36.4988260 |
| C         | 42.4710410 | 49.3273020 | 36.0506770 | C  | 36.6763730 | 42.6648900 | 35.8915400 |
| O         | 42.9436770 | 49.4529200 | 34.8875910 | H  | 36.6716190 | 41.7732100 | 35.2836280 |
| O         | 41.3854200 | 49.8225270 | 36.4622550 | N  | 40.1485990 | 52.0628160 | 32.3703920 |
| H         | 43.1053230 | 48.7924550 | 38.0424910 | H  | 40.7619710 | 52.2772120 | 31.5932590 |
| H         | 44.3510110 | 48.6067700 | 36.7986860 | C  | 40.7310310 | 51.2734620 | 33.3457180 |
| C         | 41.6344540 | 46.5669250 | 36.6916830 | N  | 40.0802320 | 51.0008310 | 34.4740830 |
| H         | 40.8389580 | 47.3014980 | 36.6108870 | H  | 40.5527780 | 50.4671000 | 35.2708490 |
| C         | 41.3398310 | 45.2067750 | 36.5529870 | H  | 39.2426430 | 51.5245620 | 34.6919150 |
| O         | 40.1345030 | 44.7390990 | 36.2168150 | N  | 41.9649280 | 50.8369300 | 33.1646490 |
| C         | 42.3616280 | 44.2458090 | 36.7553320 | H  | 42.4586300 | 50.2890440 | 33.9671090 |
| O         | 41.9477520 | 42.9406810 | 36.7827200 | H  | 42.3913550 | 50.9564550 | 32.2460520 |
| H         | 41.3559890 | 42.7608390 | 37.8410370 | C  | 39.0103810 | 42.9089030 | 32.0344430 |
| C         | 43.6746660 | 44.6523250 | 36.9213720 | H  | 39.4147280 | 42.0838750 | 31.4358970 |
| H         | 44.4602800 | 43.9088650 | 37.0443700 | H  | 38.9798000 | 43.7973730 | 31.3978460 |
| C         | 43.9676690 | 46.0198160 | 36.9536920 | C  | 39.9976010 | 43.1457030 | 33.1863500 |
| H         | 45.0010210 | 46.3370790 | 37.0641000 | O  | 39.7521360 | 42.4067930 | 34.2467940 |
| O         | 40.2505140 | 42.8374770 | 38.4149070 | O  | 40.9416770 | 43.9211220 | 33.0669160 |
| O         | 40.1417670 | 44.0198790 | 39.0210320 | Fe | 40.0234820 | 42.8038010 | 36.0952430 |
| H         | 40.0757658 | 37.9771700 | 38.3946974 | C  | 42.8974980 | 46.9245150 | 37.0336370 |
| H         | 43.9066902 | 39.0388694 | 41.2386058 | C  | 43.2422290 | 48.3948210 | 37.1915720 |
| H         | 34.5470983 | 43.4617096 | 35.8863111 | C  | 42.4658570 | 49.2610750 | 36.1893770 |
| H         | 39.1334824 | 52.0665181 | 32.0435633 | O  | 43.0011940 | 49.4044880 | 35.0566450 |
| H         | 38.0252835 | 42.6651099 | 32.4128306 | O  | 41.3517020 | 49.7342480 | 36.5460190 |
|           |            |            |            | H  | 43.0247040 | 48.7410900 | 38.2082710 |
| <b>52</b> |            |            |            | H  | 44.3128530 | 48.5355020 | 37.0118880 |
| C         | 40.2527310 | 38.7344110 | 37.7321850 | C  | 41.5876280 | 46.5184640 | 36.8426050 |
| N         | 41.2078850 | 38.7277090 | 36.7393240 | H  | 40.7855070 | 47.2492320 | 36.8099650 |
| H         | 41.9194900 | 38.0041610 | 36.5702960 | C  | 41.2937770 | 45.1647350 | 36.5681310 |
| C         | 41.1449870 | 39.9169450 | 36.0924430 | O  | 40.1329470 | 44.7482140 | 36.1343510 |
| H         | 41.8064110 | 40.1719370 | 35.2799460 | C  | 42.3505370 | 44.1741410 | 36.6001760 |

|                        |            |            |            |                        |            |            |            |
|------------------------|------------|------------|------------|------------------------|------------|------------|------------|
| O                      | 42.0040130 | 42.9541060 | 36.2921580 | H                      | 42.4032330 | 50.9540330 | 32.2771310 |
| H                      | 40.8655050 | 42.2408300 | 38.6686630 | C                      | 39.0214560 | 42.9574680 | 31.9985650 |
| C                      | 43.6674850 | 44.6013700 | 36.8585880 | H                      | 39.4198430 | 42.1479300 | 31.3752840 |
| H                      | 44.4740810 | 43.8699950 | 36.8615180 | H                      | 38.9700370 | 43.8589700 | 31.3817510 |
| C                      | 43.9272830 | 45.9481690 | 37.0353200 | C                      | 40.0320720 | 43.1706650 | 33.1363520 |
| H                      | 44.9557630 | 46.2740130 | 37.1739650 | O                      | 39.8451510 | 42.3764600 | 34.1607320 |
| O                      | 40.1763920 | 42.9264120 | 38.3881050 | O                      | 40.9496430 | 43.9828680 | 33.0233170 |
| O                      | 40.6435540 | 44.1405780 | 38.8397320 | Fe                     | 39.9548660 | 42.7514490 | 36.0431570 |
| H                      | 40.1191371 | 37.9264912 | 38.4449536 | C                      | 42.8139170 | 46.9138380 | 37.1120610 |
| H                      | 43.7873489 | 39.1035511 | 41.1715511 | C                      | 43.1830460 | 48.3800710 | 37.2481200 |
| H                      | 34.5876728 | 43.4599940 | 35.8683467 | C                      | 42.4248800 | 49.2469870 | 36.2304150 |
| H                      | 39.1738666 | 51.9434009 | 32.0691364 | O                      | 42.9913710 | 49.4036110 | 35.1164540 |
| H                      | 37.9753840 | 42.6352270 | 32.3617857 | O                      | 41.2972460 | 49.7044060 | 36.5636720 |
|                        |            |            |            | H                      | 42.9761930 | 48.7390980 | 38.2626580 |
| <b><sup>5</sup>TS2</b> |            |            |            | H                      | 44.2561210 | 48.4991540 | 37.0672270 |
| C                      | 40.2433440 | 38.7315490 | 37.7459100 | C                      | 41.5240320 | 46.5119640 | 36.9103420 |
| N                      | 41.1935150 | 38.7309700 | 36.7478290 | H                      | 40.7203550 | 47.2394030 | 36.8549810 |
| H                      | 41.9107230 | 38.0140410 | 36.5781090 | C                      | 41.2129910 | 45.1328660 | 36.6240310 |
| C                      | 41.1161940 | 39.9201690 | 36.1007990 | O                      | 40.1159830 | 44.7791430 | 36.0746740 |
| H                      | 41.7661970 | 40.1806910 | 35.2808160 | C                      | 42.3099080 | 44.1340820 | 36.6641620 |
| N                      | 40.1575220 | 40.6693740 | 36.6159930 | O                      | 42.0336490 | 42.9482010 | 36.3070130 |
| C                      | 39.5972110 | 39.9329650 | 37.6377110 | H                      | 40.8756890 | 42.3864040 | 38.5902690 |
| H                      | 38.7947680 | 40.3261440 | 38.2438390 | C                      | 43.6295720 | 44.5913900 | 36.9757450 |
| C                      | 43.3312320 | 39.6449030 | 40.3202870 | H                      | 44.4422040 | 43.8671380 | 36.9937260 |
| N                      | 44.0015080 | 39.9891490 | 39.1602820 | C                      | 43.8639920 | 45.9244490 | 37.1473930 |
| H                      | 44.8715880 | 39.6022570 | 38.8184480 | H                      | 44.8829710 | 46.2681130 | 37.3084220 |
| C                      | 43.1801470 | 40.8027440 | 38.4377330 | O                      | 40.2173270 | 43.0903530 | 38.3167760 |
| H                      | 43.4435080 | 41.2046190 | 37.4690280 | O                      | 40.8422560 | 44.3132270 | 38.6200760 |
| N                      | 42.0491700 | 41.0237300 | 39.0775260 | H                      | 40.1146639 | 37.9205346 | 38.4558959 |
| C                      | 42.1317090 | 40.3036660 | 40.2483340 | H                      | 43.7714763 | 39.1130060 | 41.1608591 |
| H                      | 41.3268210 | 40.3054990 | 40.9715070 | H                      | 34.5178959 | 43.4359373 | 35.8364855 |
| C                      | 35.5639850 | 43.4796680 | 36.1335140 | H                      | 39.1742172 | 51.9318933 | 32.0694814 |
| N                      | 36.1118440 | 44.4927150 | 36.8945070 | H                      | 37.9952752 | 42.6675857 | 32.3412541 |
| H                      | 35.6202210 | 45.2940110 | 37.2954830 |                        |            |            |            |
| C                      | 37.4364550 | 44.2402750 | 37.0385970 | <b><sup>5</sup>TS3</b> |            |            |            |
| H                      | 38.1025820 | 44.8836250 | 37.5917510 | C                      | 40.1863340 | 38.7685960 | 37.8343700 |
| N                      | 37.7713470 | 43.1235460 | 36.4121210 | N                      | 41.0600700 | 38.7854670 | 36.7672890 |
| C                      | 36.6071590 | 42.6423520 | 35.8439200 | H                      | 41.7790970 | 38.0778970 | 36.5572170 |
| H                      | 36.5898120 | 41.7343390 | 35.2601760 | C                      | 40.9689370 | 40.0012470 | 36.1741730 |
| N                      | 40.1493270 | 52.0408980 | 32.3730700 | H                      | 41.5699790 | 40.2874680 | 35.3254360 |
| H                      | 40.7677460 | 52.2569800 | 31.6003640 | N                      | 40.0699510 | 40.7508510 | 36.7888850 |
| C                      | 40.7217980 | 51.2552920 | 33.3546570 | C                      | 39.5698490 | 39.9917980 | 37.8257860 |
| N                      | 40.0603060 | 50.9756280 | 34.4744850 | H                      | 38.8212770 | 40.3810030 | 38.4991400 |
| H                      | 40.5235510 | 50.4405950 | 35.2749940 | C                      | 43.8334820 | 39.8232380 | 40.0576850 |
| H                      | 39.2113290 | 51.4855260 | 34.6812130 | N                      | 44.9380620 | 40.3766590 | 39.4417270 |
| N                      | 41.9629620 | 50.8304280 | 33.1876800 | H                      | 45.9003800 | 40.2836760 | 39.7320060 |
| H                      | 42.4506460 | 50.2929700 | 33.9902290 | C                      | 44.5046560 | 41.0684010 | 38.3582900 |

|    |            |            |            |           |            |            |            |
|----|------------|------------|------------|-----------|------------|------------|------------|
| H  | 45.1737670 | 41.5475870 | 37.6598610 | O         | 40.6001240 | 44.5774880 | 38.3807130 |
| N  | 43.1926690 | 41.0205470 | 38.2581070 | H         | 40.0703942 | 37.9258552 | 38.5098237 |
| C  | 42.7596250 | 40.2490110 | 39.3213950 | H         | 43.8907978 | 39.2167120 | 40.9635111 |
| H  | 41.7123720 | 40.0516740 | 39.4786330 | H         | 34.3503036 | 43.4039612 | 35.8025181 |
| C  | 35.3941450 | 43.4860600 | 36.0928340 | H         | 39.1548905 | 51.9589745 | 32.0672323 |
| N  | 35.9104360 | 44.5279440 | 36.8363320 | H         | 38.0246872 | 42.6183913 | 32.4884808 |
| H  | 35.4021960 | 45.3315310 | 37.2099690 |           |            |            |            |
| C  | 37.2291530 | 44.2981270 | 37.0291530 | <b>53</b> |            |            |            |
| H  | 37.8723640 | 44.9599830 | 37.5872900 | C         | 40.1939570 | 38.7648560 | 37.8361070 |
| N  | 37.5894420 | 43.1665070 | 36.4426930 | N         | 41.0817150 | 38.7794130 | 36.7806770 |
| C  | 36.4521160 | 42.6542460 | 35.8514800 | H         | 41.7972260 | 38.0670130 | 36.5750010 |
| H  | 36.4623620 | 41.7287670 | 35.2961880 | C         | 41.0036890 | 39.9962530 | 36.1882760 |
| N  | 40.1278150 | 52.0766140 | 32.3741300 | H         | 41.6208210 | 40.2800590 | 35.3502090 |
| H  | 40.7461670 | 52.2957100 | 31.6020740 | N         | 40.1001210 | 40.7494880 | 36.7915830 |
| C  | 40.7025980 | 51.2778610 | 33.3466770 | C         | 39.5835020 | 39.9916160 | 37.8214280 |
| N  | 40.0427870 | 50.9951950 | 34.4671800 | H         | 38.8297280 | 40.3836350 | 38.4874140 |
| H  | 40.5097840 | 50.4524700 | 35.2642590 | C         | 43.8317630 | 39.8230010 | 40.1488110 |
| H  | 39.2045600 | 51.5188630 | 34.6824700 | N         | 44.9272820 | 40.4558370 | 39.5963440 |
| N  | 41.9386580 | 50.8450330 | 33.1711180 | H         | 45.8769970 | 40.4210330 | 39.9381430 |
| H  | 42.4239640 | 50.2851390 | 33.9731350 | C         | 44.4977370 | 41.1527930 | 38.5137900 |
| H  | 42.3689420 | 50.9641460 | 32.2547210 | H         | 45.1600600 | 41.7077140 | 37.8685970 |
| C  | 39.0673530 | 42.8707300 | 32.1696220 | N         | 43.1971630 | 41.0256340 | 38.3520670 |
| H  | 39.4656460 | 42.0275620 | 31.5913430 | C         | 42.7672970 | 40.2013630 | 39.3756590 |
| H  | 39.0524790 | 43.7428210 | 31.5093320 | H         | 41.7285290 | 39.9373380 | 39.4811990 |
| C  | 40.0558640 | 43.1355730 | 33.3220760 | C         | 35.4462450 | 43.5041810 | 36.1173270 |
| O  | 39.8023160 | 42.4629250 | 34.4196310 | N         | 35.9591940 | 44.5402890 | 36.8717460 |
| O  | 41.0166770 | 43.8821220 | 33.1512400 | H         | 35.4477000 | 45.3391320 | 37.2512770 |
| Fe | 39.7570820 | 42.8858880 | 36.3115440 | C         | 37.2801290 | 44.3166560 | 37.0578780 |
| C  | 42.8647910 | 46.9282750 | 37.0743100 | H         | 37.9219840 | 44.9749450 | 37.6221440 |
| C  | 43.1883000 | 48.4085600 | 37.2009760 | N         | 37.6448490 | 43.1948180 | 36.4559650 |
| C  | 42.4106600 | 49.2564630 | 36.1872640 | C         | 36.5088370 | 42.6818540 | 35.8628610 |
| O  | 42.9601040 | 49.4062100 | 35.0612580 | H         | 36.5232910 | 41.7623780 | 35.2978150 |
| O  | 41.2886610 | 49.7198740 | 36.5321570 | N         | 40.1150100 | 52.0999380 | 32.3798100 |
| H  | 42.9671420 | 48.7609230 | 38.2142160 | H         | 40.7331410 | 52.3270640 | 31.6098790 |
| H  | 44.2574340 | 48.5587310 | 37.0209170 | C         | 40.6929380 | 51.2952170 | 33.3460570 |
| C  | 41.5629330 | 46.4872760 | 36.9872980 | N         | 40.0358300 | 51.0079420 | 34.4670910 |
| H  | 40.7389510 | 47.1935650 | 36.9858170 | H         | 40.5021120 | 50.4580180 | 35.2592820 |
| C  | 41.2317360 | 45.0735330 | 36.8092530 | H         | 39.2006400 | 51.5340660 | 34.6881850 |
| O  | 40.2218970 | 44.7503850 | 36.0100710 | N         | 41.9281900 | 50.8631090 | 33.1646900 |
| C  | 42.4008400 | 44.1639540 | 36.7498350 | H         | 42.4098840 | 50.2878920 | 33.9597740 |
| O  | 42.0470360 | 42.8639620 | 36.4997730 | H         | 42.3511030 | 50.9766700 | 32.2439990 |
| H  | 42.4653470 | 42.2098370 | 37.1335870 | C         | 39.0761710 | 42.8709590 | 32.1718550 |
| C  | 43.6865540 | 44.6140380 | 36.8688320 | H         | 39.4749520 | 42.0293330 | 31.5918180 |
| H  | 44.5199360 | 43.9150490 | 36.8117970 | H         | 39.0595980 | 43.7435390 | 31.5123390 |
| C  | 43.9271480 | 45.9932390 | 37.0177140 | C         | 40.0690540 | 43.1371060 | 33.3189830 |
| H  | 44.9531060 | 46.3467220 | 37.0650880 | O         | 39.8078000 | 42.4808490 | 34.4286010 |
| O  | 39.8252270 | 43.4581440 | 38.1374630 | O         | 41.0393210 | 43.8663690 | 33.1399370 |

|                        |            |            |            |    |            |            |            |
|------------------------|------------|------------|------------|----|------------|------------|------------|
| Fe                     | 39.8107490 | 42.9113470 | 36.3068570 | C  | 37.3324610 | 44.4387960 | 37.0641010 |
| C                      | 42.8725950 | 46.9272550 | 37.0632660 | H  | 37.9717550 | 45.1103660 | 37.6183570 |
| C                      | 43.1920580 | 48.4101620 | 37.1737690 | N  | 37.7097780 | 43.3237280 | 36.4583240 |
| C                      | 42.4002900 | 49.2514350 | 36.1656670 | C  | 36.5740230 | 42.7820430 | 35.8888270 |
| O                      | 42.9381430 | 49.3969840 | 35.0329250 | H  | 36.5980870 | 41.8609930 | 35.3257340 |
| O                      | 41.2840670 | 49.7179350 | 36.5228950 | N  | 40.0885160 | 52.2545700 | 32.3319940 |
| H                      | 42.9815510 | 48.7662800 | 38.1876650 | H  | 40.7055060 | 52.4886870 | 31.5633780 |
| H                      | 44.2579680 | 48.5636420 | 36.9792510 | C  | 40.6609610 | 51.4293470 | 33.2832380 |
| C                      | 41.5782820 | 46.4731440 | 37.1254010 | N  | 40.0045640 | 51.1400260 | 34.4034710 |
| H                      | 40.7512040 | 47.1695500 | 37.2226830 | H  | 40.4661080 | 50.5842060 | 35.1965870 |
| C                      | 41.2159600 | 45.0272200 | 37.0134830 | H  | 39.1861370 | 51.6883070 | 34.6336770 |
| O                      | 40.2940610 | 44.7384170 | 36.0326950 | N  | 41.8870710 | 50.9770610 | 33.0856040 |
| C                      | 42.4293370 | 44.1446990 | 36.8130170 | H  | 42.3543860 | 50.3803790 | 33.8601650 |
| O                      | 42.0931890 | 42.8365730 | 36.5401720 | H  | 42.2991790 | 51.0776100 | 32.1571170 |
| H                      | 42.4552380 | 42.1882710 | 37.2141930 | C  | 39.0978570 | 42.9471950 | 32.0639020 |
| C                      | 43.7018460 | 44.6235410 | 36.7474980 | H  | 39.4852030 | 42.1202330 | 31.4565090 |
| H                      | 44.5287170 | 43.9414020 | 36.5544530 | H  | 39.0447830 | 43.8297510 | 31.4202400 |
| C                      | 43.9399180 | 46.0089350 | 36.8877210 | C  | 40.1375550 | 43.2014420 | 33.1684170 |
| H                      | 44.9599280 | 46.3790800 | 36.8293220 | O  | 39.9343340 | 42.5128380 | 34.2728080 |
| O                      | 39.9049240 | 43.4227420 | 38.1654300 | O  | 41.0946170 | 43.9394610 | 32.9706170 |
| O                      | 40.5817830 | 44.6899460 | 38.3147760 | Fe | 39.7921160 | 42.9198730 | 36.1243510 |
| H                      | 40.0726279 | 37.9234145 | 38.5127768 | C  | 42.8065210 | 47.0290240 | 36.9821630 |
| H                      | 43.8878215 | 39.1936350 | 41.0374708 | C  | 43.1059290 | 48.5129570 | 37.0988350 |
| H                      | 34.4032592 | 43.4235575 | 35.8211954 | C  | 42.3185040 | 49.3466400 | 36.0827860 |
| H                      | 39.1436882 | 51.9766459 | 32.0704238 | O  | 42.8326990 | 49.4359130 | 34.9345570 |
| H                      | 38.0341972 | 42.6174078 | 32.4913660 | O  | 41.2280510 | 49.8591630 | 36.4572310 |
|                        |            |            |            | H  | 42.8780680 | 48.8584330 | 38.1115780 |
| <b><sup>5</sup>TS4</b> |            |            |            | H  | 44.1726260 | 48.6790850 | 36.9198540 |
| C                      | 40.1561370 | 38.8583710 | 37.7294040 | C  | 41.5445410 | 46.5372130 | 37.1382830 |
| N                      | 41.0701270 | 38.8709580 | 36.6992880 | H  | 40.7044480 | 47.2078460 | 37.2956390 |
| H                      | 41.7960670 | 38.1636070 | 36.5198490 | C  | 41.2333490 | 45.0769140 | 37.0467930 |
| C                      | 41.0171930 | 40.0865220 | 36.1097820 | O  | 40.3974760 | 44.7376310 | 36.0026880 |
| H                      | 41.6535830 | 40.3635960 | 35.2847270 | C  | 42.4841180 | 44.2214050 | 36.9534430 |
| N                      | 40.0864160 | 40.8394280 | 36.6762840 | O  | 42.2725520 | 42.9330630 | 37.0774040 |
| C                      | 39.5423200 | 40.0813270 | 37.6945720 | H  | 41.3882190 | 42.8625770 | 37.7907500 |
| H                      | 38.7793890 | 40.4721930 | 38.3509620 | C  | 43.7398710 | 44.7625790 | 36.6962220 |
| C                      | 43.5678140 | 39.5511930 | 40.4569870 | H  | 44.5852520 | 44.0915200 | 36.5685370 |
| N                      | 44.4045500 | 40.0497490 | 39.4804630 | C  | 43.8997760 | 46.1355960 | 36.7235670 |
| H                      | 45.4060290 | 39.9387790 | 39.4203030 | H  | 44.8909340 | 46.5582770 | 36.5785020 |
| C                      | 43.6165390 | 40.6505290 | 38.5425160 | O  | 40.2039540 | 43.3098240 | 38.2048480 |
| H                      | 44.0170700 | 41.1284080 | 37.6596130 | O  | 40.5477010 | 44.7337580 | 38.2987510 |
| N                      | 42.3460850 | 40.5880600 | 38.8731660 | H  | 40.0509774 | 38.0302686 | 38.4266126 |
| C                      | 42.3043510 | 39.9036300 | 40.0662080 | H  | 43.9053447 | 38.9980594 | 41.3246339 |
| H                      | 41.3709620 | 39.7184180 | 40.5817330 | H  | 34.4580613 | 43.4846868 | 35.8583923 |
| C                      | 35.4986380 | 43.5807240 | 36.1607580 | H  | 39.1184707 | 52.1291774 | 32.0217417 |
| N                      | 36.0021680 | 44.6293270 | 36.9046920 | H  | 38.0714084 | 42.6730203 | 32.4185786 |
| H                      | 35.4798380 | 45.4178520 | 37.2920280 |    |            |            |            |



|    |            |            |            |   |            |            |            |
|----|------------|------------|------------|---|------------|------------|------------|
| 54 |            |            |            | H | 44.2123300 | 48.4925180 | 37.1544040 |
| C  | 40.1883970 | 38.7819150 | 37.7633840 | C | 41.5174940 | 46.4302040 | 37.2836340 |
| N  | 41.1273940 | 38.8094440 | 36.7554400 | H | 40.6943180 | 47.1144730 | 37.4665650 |
| H  | 41.8514090 | 38.1029110 | 36.5677810 | C | 41.1397210 | 44.9894970 | 37.0679660 |
| C  | 41.0262060 | 40.0089750 | 36.1275960 | O | 40.0802040 | 44.7989560 | 36.2948120 |
| H  | 41.6642000 | 40.2900690 | 35.3044680 | C | 42.3212060 | 44.0900170 | 36.6515040 |
| N  | 40.0612110 | 40.7369460 | 36.6622210 | O | 42.0485400 | 42.9241430 | 36.3079910 |
| C  | 39.5236130 | 39.9759040 | 37.6782140 | H | 40.8954000 | 42.5685100 | 38.6435700 |
| H  | 38.7195130 | 40.3441060 | 38.2977180 | C | 43.6613320 | 44.6164750 | 36.6609490 |
| C  | 43.3006150 | 39.6597980 | 40.3020200 | H | 44.4824340 | 43.9447220 | 36.4237600 |
| N  | 43.9868310 | 40.0255300 | 39.1581800 | C | 43.8604000 | 45.9378060 | 36.8967350 |
| H  | 44.8622670 | 39.6452840 | 38.8230230 | H | 44.8745940 | 46.3325890 | 36.8566160 |
| C  | 43.1751910 | 40.8516510 | 38.4393560 | O | 40.1890550 | 43.2428250 | 38.4272950 |
| H  | 43.4516440 | 41.2661370 | 37.4796530 | O | 40.8532270 | 44.5281240 | 38.4986290 |
| N  | 42.0346600 | 41.0639530 | 39.0658730 | H | 40.0783823 | 37.9593264 | 38.4638588 |
| C  | 42.0999180 | 40.3174040 | 40.2229690 | H | 43.7380629 | 39.1267935 | 41.1442411 |
| H  | 41.2844540 | 40.3036300 | 40.9340620 | H | 34.4089490 | 43.4038266 | 35.7998935 |
| C  | 35.4553030 | 43.4785780 | 36.0859660 | H | 39.1556382 | 51.8905405 | 32.0935746 |
| N  | 35.9873330 | 44.5379080 | 36.7918440 | H | 38.0119009 | 42.6662766 | 32.3472774 |
| H  | 35.4814380 | 45.3393160 | 37.1738760 |   |            |            |            |
| C  | 37.3186540 | 44.3233510 | 36.9324630 |   |            |            |            |
| H  | 37.9823010 | 45.0164970 | 37.4235110 |   |            |            |            |
| N  | 37.6733310 | 43.1854510 | 36.3559010 |   |            |            |            |
| C  | 36.5138000 | 42.6502820 | 35.8276190 |   |            |            |            |
| H  | 36.5107970 | 41.7151320 | 35.2876700 |   |            |            |            |
| N  | 40.1310820 | 51.9882330 | 32.4015030 |   |            |            |            |
| H  | 40.7538940 | 52.1885510 | 31.6277760 |   |            |            |            |
| C  | 40.6900910 | 51.1929200 | 33.3831960 |   |            |            |            |
| N  | 40.0329430 | 50.9373010 | 34.5098110 |   |            |            |            |
| H  | 40.4817830 | 50.3818940 | 35.3056670 |   |            |            |            |
| H  | 39.1935750 | 51.4626380 | 34.7167280 |   |            |            |            |
| N  | 41.9104650 | 50.7146540 | 33.2013420 |   |            |            |            |
| H  | 42.4297530 | 50.2574180 | 34.0222550 |   |            |            |            |
| H  | 42.3685510 | 50.8828330 | 32.3028750 |   |            |            |            |
| C  | 39.0318650 | 42.9639740 | 31.9925450 |   |            |            |            |
| H  | 39.4261800 | 42.1598370 | 31.3598880 |   |            |            |            |
| H  | 38.9660270 | 43.8672320 | 31.3795070 |   |            |            |            |
| C  | 40.0631700 | 43.1792430 | 33.1125160 |   |            |            |            |
| O  | 39.8934680 | 42.3957350 | 34.1464740 |   |            |            |            |
| O  | 40.9853960 | 43.9812830 | 32.9706250 |   |            |            |            |
| Fe | 39.8348970 | 42.8021980 | 36.0244130 |   |            |            |            |
| C  | 42.7863630 | 46.8824870 | 37.1821190 |   |            |            |            |
| C  | 43.1393720 | 48.3546910 | 37.3173150 |   |            |            |            |
| C  | 42.3866180 | 49.2090220 | 36.2825280 |   |            |            |            |
| O  | 42.9870730 | 49.3985950 | 35.1921790 |   |            |            |            |
| O  | 41.2372390 | 49.6278250 | 36.5903980 |   |            |            |            |
| H  | 42.9052640 | 48.7129130 | 38.3244830 |   |            |            |            |

Septet state

|    |            |            |            |             |            |            |            |
|----|------------|------------|------------|-------------|------------|------------|------------|
| 71 |            |            |            | H           | 43.2044440 | 48.7538790 | 38.0492070 |
|    |            |            |            | H           | 44.4688130 | 48.6459250 | 36.8105660 |
| C  | 40.3445830 | 38.6479950 | 37.8390860 | C           | 41.8281030 | 46.5015250 | 36.7548480 |
| N  | 41.2382820 | 38.6134900 | 36.7884180 | H           | 41.0019840 | 47.2056640 | 36.7727750 |
| H  | 41.9248820 | 37.8720170 | 36.5872810 | C           | 41.5560200 | 45.1419660 | 36.5822240 |
| C  | 41.2313520 | 39.8331320 | 36.1955980 | O           | 40.3306790 | 44.6760670 | 36.3557220 |
| H  | 41.8723930 | 40.0775590 | 35.3626850 | C           | 42.6293660 | 44.2273150 | 36.6179140 |
| N  | 40.3641680 | 40.6330760 | 36.7920880 | O           | 42.2532180 | 42.8928350 | 36.4922170 |
| C  | 39.7997600 | 39.9040600 | 37.8189470 | H           | 42.7409020 | 42.3210350 | 37.1507590 |
| H  | 39.0819140 | 40.3435820 | 38.4942120 | C           | 43.9374080 | 44.6657630 | 36.6930810 |
| C  | 43.9347840 | 39.9025930 | 40.1454140 | H           | 44.7551030 | 43.9482270 | 36.6628500 |
| N  | 45.0281670 | 40.7306560 | 39.9989010 | C           | 44.1915570 | 46.0395890 | 36.7891560 |
| H  | 45.8370380 | 40.7675930 | 40.6072340 | H           | 45.2202670 | 46.3853840 | 36.8220490 |
| C  | 44.7968640 | 41.5335400 | 38.9280680 | O           | 40.2260570 | 42.6713670 | 38.5072460 |
| H  | 45.4775120 | 42.3166350 | 38.6383370 | O           | 39.9211730 | 43.8069260 | 39.0826250 |
| N  | 43.6306480 | 41.2668110 | 38.3749570 | H           | 40.1754051 | 37.8242540 | 38.5256195 |
| C  | 43.0772390 | 40.2571790 | 39.1394310 | H           | 43.8262988 | 39.2057564 | 40.9769114 |
| H  | 42.1023740 | 39.8568290 | 38.9214070 | H           | 34.6647629 | 43.4502126 | 35.9292669 |
| C  | 35.6918710 | 43.4949690 | 36.2899800 | H           | 39.1399519 | 51.9949817 | 32.0780822 |
| N  | 36.1896380 | 44.5116340 | 37.0824120 | H           | 38.0362279 | 42.5601429 | 32.5916022 |
| H  | 35.6753180 | 45.3191760 | 37.4401040 |             |            |            |            |
| C  | 37.4996560 | 44.2675530 | 37.3147760 | <b>7TS1</b> |            |            |            |
| H  | 38.1401760 | 44.8912880 | 37.9192480 | C           | 40.1955440 | 38.7892850 | 37.6877740 |
| N  | 37.8722450 | 43.1479010 | 36.7128780 | N           | 41.1092300 | 38.7804410 | 36.6561500 |
| C  | 36.7520440 | 42.6603490 | 36.0657040 | H           | 41.8368950 | 38.0725710 | 36.4899810 |
| H  | 36.7799480 | 41.7508190 | 35.4864270 | C           | 41.0516280 | 39.9824230 | 36.0400420 |
| N  | 40.1082510 | 52.1554720 | 32.3805540 | H           | 41.6987140 | 40.2470110 | 35.2193900 |
| H  | 40.7065480 | 52.4188900 | 31.6065490 | N           | 40.1184240 | 40.7418620 | 36.5901870 |
| C  | 40.7347590 | 51.3582960 | 33.3230160 | C           | 39.5765810 | 40.0069300 | 37.6252380 |
| N  | 40.1239300 | 51.0579270 | 34.4659890 | H           | 38.8151120 | 40.4172940 | 38.2702310 |
| H  | 40.6223650 | 50.5115500 | 35.2382770 | C           | 43.5980360 | 39.5863290 | 40.3506280 |
| H  | 39.2926630 | 51.5754730 | 34.7203760 | N           | 44.4605030 | 40.0466620 | 39.3764610 |
| N  | 41.9681810 | 50.9440110 | 33.0951800 | H           | 45.4585850 | 39.9043350 | 39.3269740 |
| H  | 42.4783100 | 50.3645270 | 33.8572150 | C           | 43.6995750 | 40.6444540 | 38.4138530 |
| H  | 42.3464350 | 51.0493200 | 32.1513800 | H           | 44.1256690 | 41.0733510 | 37.5165120 |
| C  | 39.0882970 | 42.8009450 | 32.2971160 | N           | 42.4242350 | 40.6169950 | 38.7261870 |
| H  | 39.4850600 | 41.9582300 | 31.7176800 | C           | 42.3493870 | 39.9646310 | 39.9356820 |
| H  | 39.0977470 | 43.6789240 | 31.6447050 | H           | 41.4032090 | 39.8139600 | 40.4383330 |
| C  | 40.0606850 | 43.0481380 | 33.4650600 | C           | 35.5925190 | 43.5003440 | 36.2118420 |
| O  | 39.7833260 | 42.3764130 | 34.5614460 | N           | 36.1172270 | 44.4519030 | 37.0657670 |
| O  | 41.0330650 | 43.7834980 | 33.3150310 | H           | 35.6209410 | 45.2451410 | 37.4776070 |
| Fe | 40.0249690 | 42.8158290 | 36.4305750 | C           | 37.4343190 | 44.1949260 | 37.2340800 |
| C  | 43.1439370 | 46.9620300 | 36.8512050 | H           | 38.0925270 | 44.7629610 | 37.8766180 |
| C  | 43.4127400 | 48.4461020 | 37.0179710 | N           | 37.7840370 | 43.1260670 | 36.5311320 |
| C  | 42.5570270 | 49.2889930 | 36.0611430 | C           | 36.6409670 | 42.6857100 | 35.8887760 |
| O  | 43.0024630 | 49.4061030 | 34.8861580 | H           | 36.6410010 | 41.8203660 | 35.2442170 |
| O  | 41.4713860 | 49.7706360 | 36.4883760 | N           | 40.1090530 | 52.2073340 | 32.3433850 |

|           |            |            |            |    |            |            |            |
|-----------|------------|------------|------------|----|------------|------------|------------|
| H         | 40.7148480 | 52.4578110 | 31.5708600 | N  | 40.2013030 | 40.6619310 | 36.5855920 |
| C         | 40.7139480 | 51.4021150 | 33.2924440 | C  | 39.6161720 | 39.9285030 | 37.5968640 |
| N         | 40.0818160 | 51.1056590 | 34.4253980 | H  | 38.8104890 | 40.3306120 | 38.1924230 |
| H         | 40.5673480 | 50.5607770 | 35.2093660 | C  | 43.3428320 | 39.6146120 | 40.3539970 |
| H         | 39.2544310 | 51.6350110 | 34.6676750 | N  | 44.0004340 | 39.9897600 | 39.1961700 |
| N         | 41.9474860 | 50.9782650 | 33.0815590 | H  | 44.8902120 | 39.6463400 | 38.8585440 |
| H         | 42.4362520 | 50.3875200 | 33.8543190 | C  | 43.1564870 | 40.7828970 | 38.4797440 |
| H         | 42.3398570 | 51.0794050 | 32.1445190 | H  | 43.4043360 | 41.2164850 | 37.5201710 |
| C         | 39.0597850 | 42.9536330 | 32.0550010 | N  | 42.0183010 | 40.9529390 | 39.1243080 |
| H         | 39.4607690 | 42.1337440 | 31.4475290 | C  | 42.1217410 | 40.2289710 | 40.2893270 |
| H         | 39.0120480 | 43.8417840 | 31.4191200 | H  | 41.3177460 | 40.2023770 | 41.0124410 |
| C         | 40.0736440 | 43.2021600 | 33.1791530 | C  | 35.6404870 | 43.4877790 | 36.1992440 |
| O         | 39.8408450 | 42.5032390 | 34.2762120 | N  | 36.1727400 | 44.4609210 | 37.0225390 |
| O         | 41.0385860 | 43.9373720 | 33.0232630 | H  | 35.6787570 | 45.2606750 | 37.4234750 |
| Fe        | 39.8892320 | 42.8418510 | 36.1275120 | C  | 37.4902160 | 44.1968970 | 37.1924700 |
| C         | 42.9349310 | 46.9764850 | 36.8907250 | H  | 38.1529520 | 44.8017640 | 37.7924120 |
| C         | 43.2673210 | 48.4515670 | 37.0285970 | N  | 37.8352750 | 43.1073740 | 36.5227460 |
| C         | 42.4605400 | 49.3221800 | 36.0597150 | C  | 36.6866660 | 42.6596880 | 35.8968780 |
| O         | 42.9428700 | 49.4481630 | 34.9007800 | H  | 36.6823000 | 41.7798720 | 35.2719570 |
| O         | 41.3733390 | 49.8199560 | 36.4640100 | N  | 40.1428210 | 52.0620900 | 32.3836480 |
| H         | 43.0776480 | 48.7840410 | 38.0560540 | H  | 40.7537000 | 52.2832850 | 31.6063890 |
| H         | 44.3326970 | 48.5980210 | 36.8222200 | C  | 40.7354950 | 51.2734730 | 33.3546870 |
| C         | 41.6174710 | 46.5592530 | 36.6878210 | N  | 40.0912120 | 50.9964770 | 34.4863550 |
| H         | 40.8230710 | 47.2940150 | 36.5989270 | H  | 40.5697680 | 50.4620180 | 35.2781700 |
| C         | 41.3232580 | 45.1978070 | 36.5451870 | H  | 39.2546480 | 51.5189810 | 34.7110980 |
| O         | 40.1258330 | 44.7294100 | 36.1856410 | N  | 41.9702390 | 50.8438350 | 33.1682190 |
| C         | 42.3479180 | 44.2410240 | 36.7541350 | H  | 42.4675910 | 50.2873370 | 33.9700540 |
| O         | 41.9400780 | 42.9345190 | 36.7678070 | H  | 42.3876020 | 50.9601160 | 32.2447430 |
| H         | 41.3743910 | 42.7656140 | 37.8521370 | C  | 39.0192030 | 42.9289130 | 32.0223040 |
| C         | 43.6594660 | 44.6486580 | 36.9404710 | H  | 39.4306700 | 42.1091850 | 31.4214580 |
| H         | 44.4440650 | 43.9049200 | 37.0688110 | H  | 38.9736740 | 43.8155200 | 31.3840580 |
| C         | 43.9502950 | 46.0143090 | 36.9767620 | C  | 40.0140760 | 43.1855700 | 33.1630140 |
| H         | 44.9814930 | 46.3341590 | 37.0981610 | O  | 39.7586240 | 42.4889750 | 34.2506120 |
| O         | 40.2748340 | 42.8870820 | 38.3919630 | O  | 40.9721700 | 43.9361720 | 33.0176980 |
| O         | 40.1413450 | 44.0560210 | 39.0265890 | Fe | 40.0302040 | 42.8009580 | 36.1022480 |
| H         | 40.0799495 | 37.9741322 | 38.3971736 | C  | 42.9594770 | 46.9087000 | 36.9816640 |
| H         | 43.9079996 | 39.0411791 | 41.2357524 | C  | 43.2905950 | 48.3802440 | 37.1575870 |
| H         | 34.5532120 | 43.4691489 | 35.8882070 | C  | 42.4957600 | 49.2525720 | 36.1752520 |
| H         | 39.1389145 | 52.0627478 | 32.0402228 | O  | 43.0143170 | 49.4062750 | 35.0348360 |
| H         | 38.0312168 | 42.6714405 | 32.3954757 | O  | 41.3857800 | 49.7219350 | 36.5486150 |
|           |            |            |            | H  | 43.0749330 | 48.7092550 | 38.1806950 |
| <b>72</b> |            |            |            | H  | 44.3580040 | 48.5362220 | 36.9717130 |
| C         | 40.2518030 | 38.7225610 | 37.7126510 | C  | 41.6368200 | 46.4996660 | 36.8388800 |
| N         | 41.2193420 | 38.7176910 | 36.7320330 | H  | 40.8334300 | 47.2297850 | 36.8512110 |
| H         | 41.9317050 | 37.9938220 | 36.5679450 | C  | 41.3359040 | 45.1545900 | 36.5815340 |
| C         | 41.1635960 | 39.9062690 | 36.0843360 | O  | 40.1310370 | 44.7269020 | 36.2489010 |
| H         | 41.8384830 | 40.1645940 | 35.2840540 | C  | 42.3825280 | 44.1690350 | 36.5564970 |

|             |            |            |            |             |            |            |            |
|-------------|------------|------------|------------|-------------|------------|------------|------------|
| O           | 42.0023500 | 42.9313870 | 36.2971460 | H           | 42.4048680 | 50.8974350 | 32.3181580 |
| H           | 40.8880300 | 42.1624740 | 38.7115500 | C           | 39.0188610 | 42.9351310 | 32.0029550 |
| C           | 43.7064220 | 44.5899460 | 36.7394070 | H           | 39.4331470 | 42.1117390 | 31.4091020 |
| H           | 44.5092130 | 43.8549790 | 36.7060100 | H           | 38.9619950 | 43.8144190 | 31.3560380 |
| C           | 43.9835390 | 45.9405160 | 36.9235530 | C           | 40.0206850 | 43.2146580 | 33.1281960 |
| H           | 45.0185820 | 46.2595710 | 37.0233980 | O           | 39.7933130 | 42.5142800 | 34.2255320 |
| O           | 40.1982160 | 42.8327120 | 38.3788790 | O           | 40.9641890 | 43.9778830 | 32.9752660 |
| O           | 40.4045250 | 44.0061370 | 39.0305310 | Fe          | 39.9995300 | 42.8036230 | 36.0693040 |
| H           | 40.1164588 | 37.9190888 | 38.4301342 | C           | 42.8628870 | 46.8508010 | 37.1181590 |
| H           | 43.7949538 | 39.0858480 | 41.1883169 | C           | 43.1973950 | 48.3271710 | 37.2664290 |
| H           | 34.6006906 | 43.4614353 | 35.8761266 | C           | 42.4321700 | 49.1913620 | 36.2528090 |
| H           | 39.1697550 | 51.9312632 | 32.0813288 | O           | 43.0026990 | 49.3712970 | 35.1411270 |
| H           | 37.9894122 | 42.6436578 | 32.3562920 | O           | 41.2994980 | 49.6401360 | 36.5823470 |
|             |            |            |            | H           | 42.9695050 | 48.6776260 | 38.2789490 |
| <b>7TS2</b> |            |            |            | H           | 44.2684460 | 48.4728730 | 37.0955630 |
| C           | 40.2227040 | 38.7628240 | 37.7314280 | C           | 41.5531670 | 46.4251270 | 37.0672820 |
| N           | 41.1874880 | 38.7662500 | 36.7477370 | H           | 40.7352950 | 47.1364080 | 37.1201340 |
| H           | 41.9080630 | 38.0503830 | 36.5861800 | C           | 41.2332500 | 45.0317830 | 36.8471360 |
| C           | 41.1217120 | 39.9529610 | 36.1015300 | O           | 40.1240230 | 44.7063070 | 36.1704430 |
| H           | 41.7962550 | 40.2226190 | 35.3050190 | C           | 42.3593820 | 44.0989980 | 36.6067410 |
| N           | 40.1511860 | 40.6994400 | 36.6038240 | O           | 41.9888480 | 42.8857090 | 36.2569680 |
| C           | 39.5764220 | 39.9635870 | 37.6193870 | H           | 40.8761230 | 42.4927550 | 38.6028520 |
| H           | 38.7699270 | 40.3585340 | 38.2183240 | C           | 43.6656740 | 44.5535180 | 36.7209970 |
| C           | 43.3171890 | 39.6563660 | 40.3151230 | H           | 44.4881310 | 43.8563010 | 36.5698680 |
| N           | 44.0009210 | 40.0444280 | 39.1771720 | C           | 43.9150790 | 45.9072740 | 36.9648070 |
| H           | 44.8991890 | 39.7062640 | 38.8579010 | H           | 44.9438210 | 46.2565030 | 37.0059000 |
| C           | 43.1709640 | 40.8471900 | 38.4521400 | O           | 40.1633450 | 43.1284020 | 38.3145270 |
| H           | 43.4426520 | 41.2817240 | 37.4995910 | O           | 40.7217800 | 44.4497310 | 38.5140650 |
| N           | 42.0173780 | 41.0167330 | 39.0679890 | H           | 40.0972980 | 37.9537019 | 38.4446570 |
| C           | 42.0976940 | 40.2761470 | 40.2271000 | H           | 43.7582506 | 39.1233398 | 41.1548467 |
| H           | 41.2786730 | 40.2407970 | 40.9338960 | H           | 34.5609362 | 43.4429255 | 35.8551484 |
| C           | 35.6049000 | 43.4771870 | 36.1619740 | H           | 39.1780754 | 51.8774237 | 32.0971405 |
| N           | 36.1520220 | 44.4805050 | 36.9379510 | H           | 37.9941135 | 42.6452385 | 32.3472569 |
| H           | 35.6606630 | 45.2833370 | 37.3370900 |             |            |            |            |
| C           | 37.4718080 | 44.2238890 | 37.0939030 | <b>7TS3</b> |            |            |            |
| H           | 38.1421720 | 44.8575210 | 37.6534670 | C           | 40.1868080 | 38.7620570 | 37.8403990 |
| N           | 37.8053350 | 43.1100160 | 36.4574840 | N           | 41.0611730 | 38.7810620 | 36.7739510 |
| C           | 36.6455540 | 42.6384200 | 35.8708590 | H           | 41.7792220 | 38.0731810 | 36.5617490 |
| H           | 36.6289680 | 41.7362690 | 35.2785010 | C           | 40.9713320 | 39.9982980 | 36.1837990 |
| N           | 40.1527700 | 51.9878120 | 32.4034970 | H           | 41.5720340 | 40.2861250 | 35.3352680 |
| H           | 40.7735230 | 52.1949880 | 31.6301170 | N           | 40.0731040 | 40.7472980 | 36.8004320 |
| C           | 40.7229990 | 51.2006090 | 33.3884490 | C           | 39.5711980 | 39.9856470 | 37.8345780 |
| N           | 40.0584010 | 50.9268020 | 34.5086530 | H           | 38.8215840 | 40.3732300 | 38.5076010 |
| H           | 40.5218280 | 50.3874080 | 35.3089230 | C           | 43.8341840 | 39.8254650 | 40.0506810 |
| H           | 39.2153050 | 51.4458520 | 34.7164350 | N           | 44.9402260 | 40.3766850 | 39.4354090 |
| N           | 41.9602580 | 50.7668330 | 33.2261700 | H           | 45.9022730 | 40.2812160 | 39.7257450 |
| H           | 42.4505850 | 50.2290280 | 34.0437240 | C           | 44.5090710 | 41.0696960 | 38.3520230 |

|    |            |            |            |           |            |            |            |
|----|------------|------------|------------|-----------|------------|------------|------------|
| H  | 45.1796360 | 41.5466180 | 37.6535050 | O         | 40.5904630 | 44.6129030 | 38.3856770 |
| N  | 43.1969680 | 41.0250780 | 38.2512060 | H         | 40.0702493 | 37.9183925 | 38.5144085 |
| C  | 42.7616220 | 40.2539500 | 39.3140190 | H         | 43.8895794 | 39.2194052 | 40.9570992 |
| H  | 41.7139380 | 40.0585040 | 39.4707470 | H         | 34.3579864 | 43.4020546 | 35.8045690 |
| C  | 35.4014000 | 43.4823690 | 36.0971760 | H         | 39.1565478 | 51.9562072 | 32.0670911 |
| N  | 35.9182810 | 44.5257570 | 36.8381700 | H         | 38.0243206 | 42.6165425 | 32.4908855 |
| H  | 35.4106380 | 45.3312490 | 37.2084560 |           |            |            |            |
| C  | 37.2358670 | 44.2930860 | 37.0357740 | <b>73</b> |            |            |            |
| H  | 37.8791680 | 44.9560430 | 37.5922160 | C         | 40.1922650 | 38.7602530 | 37.8423430 |
| N  | 37.5951740 | 43.1581050 | 36.4552350 | N         | 41.0810130 | 38.7761290 | 36.7878100 |
| C  | 36.4580820 | 42.6470250 | 35.8621910 | H         | 41.7953030 | 38.0630030 | 36.5805130 |
| H  | 36.4676220 | 41.7197040 | 35.3099650 | C         | 41.0067120 | 39.9947670 | 36.1992770 |
| N  | 40.1296390 | 52.0743130 | 32.3733090 | H         | 41.6249000 | 40.2798380 | 35.3623480 |
| H  | 40.7474290 | 52.2931630 | 31.6007410 | N         | 40.1047600 | 40.7484320 | 36.8046930 |
| C  | 40.7056260 | 51.2775870 | 33.3466460 | C         | 39.5846300 | 39.9884190 | 37.8311990 |
| N  | 40.0467840 | 50.9954080 | 34.4677950 | H         | 38.8311200 | 40.3801690 | 38.4975280 |
| H  | 40.5148610 | 50.4545420 | 35.2652070 | C         | 43.8355250 | 39.8264610 | 40.1393180 |
| H  | 39.2073790 | 51.5173740 | 34.6826210 | N         | 44.9341820 | 40.4605240 | 39.5946050 |
| N  | 41.9423150 | 50.8463360 | 33.1711170 | H         | 45.8812010 | 40.4280370 | 39.9440760 |
| H  | 42.4288350 | 50.2887490 | 33.9732510 | C         | 44.5115870 | 41.1563730 | 38.5087120 |
| H  | 42.3723010 | 50.9653220 | 32.2545900 | H         | 45.1777070 | 41.7111550 | 37.8677190 |
| C  | 39.0672340 | 42.8686170 | 32.1724010 | N         | 43.2125150 | 41.0276930 | 38.3370990 |
| H  | 39.4645400 | 42.0264220 | 31.5919650 | C         | 42.7763260 | 40.2032030 | 39.3581500 |
| H  | 39.0530570 | 43.7423040 | 31.5141510 | H         | 41.7373000 | 39.9377460 | 39.4568530 |
| C  | 40.0558750 | 43.1291940 | 33.3261660 | C         | 35.4529980 | 43.5004190 | 36.1223060 |
| O  | 39.8035430 | 42.4517090 | 34.4196520 | N         | 35.9675810 | 44.5368580 | 36.8751920 |
| O  | 41.0161820 | 43.8778830 | 33.1570560 | H         | 35.4574500 | 45.3376780 | 37.2524100 |
| Fe | 39.7629290 | 42.8729270 | 36.3165520 | C         | 37.2874240 | 44.3095550 | 37.0646890 |
| C  | 42.8641900 | 46.9335680 | 37.0775680 | H         | 37.9306070 | 44.9683540 | 37.6267840 |
| C  | 43.1959120 | 48.4123070 | 37.2026270 | N         | 37.6500010 | 43.1848440 | 36.4667530 |
| C  | 42.4180570 | 49.2612070 | 36.1897050 | C         | 36.5136130 | 42.6741350 | 35.8723490 |
| O  | 42.9667880 | 49.4105910 | 35.0634880 | H         | 36.5265010 | 41.7533020 | 35.3094670 |
| O  | 41.2958310 | 49.7240150 | 36.5346420 | N         | 40.1185930 | 52.0945120 | 32.3790850 |
| H  | 42.9803000 | 48.7663420 | 38.2165490 | H         | 40.7362040 | 52.3203530 | 31.6083580 |
| H  | 44.2650330 | 48.5572650 | 37.0182230 | C         | 40.6973390 | 51.2916640 | 33.3463810 |
| C  | 41.5633910 | 46.5027980 | 36.9711850 | N         | 40.0409920 | 51.0055650 | 34.4681250 |
| H  | 40.7441600 | 47.2143140 | 36.9566620 | H         | 40.5083790 | 50.4574400 | 35.2609230 |
| C  | 41.2224500 | 45.0864700 | 36.7970320 | H         | 39.2050530 | 51.5307240 | 34.6886550 |
| O  | 40.2127110 | 44.7594180 | 36.0133280 | N         | 41.9328340 | 50.8600540 | 33.1652780 |
| C  | 42.3906290 | 44.1686490 | 36.7587670 | H         | 42.4150610 | 50.2858890 | 33.9608470 |
| O  | 42.0311810 | 42.8709880 | 36.5114790 | H         | 42.3556850 | 50.9732680 | 32.2445270 |
| H  | 42.4633780 | 42.2122360 | 37.1319910 | C         | 39.0770420 | 42.8657660 | 32.1793880 |
| C  | 43.6781660 | 44.6133920 | 36.8831910 | H         | 39.4738960 | 42.0240220 | 31.5981790 |
| H  | 44.5090160 | 43.9105400 | 36.8351920 | H         | 39.0631400 | 43.7394820 | 31.5213110 |
| C  | 43.9242520 | 45.9908410 | 37.0320980 | C         | 40.0700050 | 43.1271860 | 33.3274640 |
| H  | 44.9512180 | 46.3397160 | 37.0880830 | O         | 39.8084900 | 42.4672580 | 34.4349060 |
| O  | 39.8265920 | 43.4848680 | 38.1551420 | O         | 41.0405330 | 43.8568240 | 33.1507320 |

|             |            |            |            |    |            |            |            |
|-------------|------------|------------|------------|----|------------|------------|------------|
| Fe          | 39.8196070 | 42.9018420 | 36.3140120 | C  | 37.3810630 | 44.3872720 | 37.0672860 |
| C           | 42.8725240 | 46.9276350 | 37.0687780 | H  | 38.0300290 | 45.0565470 | 37.6125350 |
| C           | 43.1995630 | 48.4095370 | 37.1754670 | N  | 37.7492840 | 43.2712660 | 36.4535050 |
| C           | 42.4079520 | 49.2514110 | 36.1677650 | C  | 36.6068840 | 42.7367810 | 35.8891160 |
| O           | 42.9445430 | 49.3955330 | 35.0342520 | H  | 36.6225800 | 41.8188430 | 35.3215410 |
| O           | 41.2921940 | 49.7191670 | 36.5251410 | N  | 40.0953630 | 52.2062570 | 32.3525930 |
| H           | 42.9946230 | 48.7688080 | 38.1895070 | H  | 40.7115060 | 52.4367830 | 31.5821800 |
| H           | 44.2654480 | 48.5577570 | 36.9766450 | C  | 40.6725620 | 51.3855800 | 33.3065230 |
| C           | 41.5766690 | 46.4835390 | 37.1061990 | N  | 40.0194820 | 51.1004110 | 34.4307280 |
| H           | 40.7523040 | 47.1853000 | 37.1858170 | H  | 40.4875420 | 50.5494350 | 35.2230010 |
| C           | 41.2050760 | 45.0352800 | 36.9980770 | H  | 39.2038350 | 51.6514800 | 34.6639780 |
| O           | 40.2800450 | 44.7397310 | 36.0275480 | N  | 41.8966590 | 50.9310020 | 33.1086620 |
| C           | 42.4205580 | 44.1468740 | 36.8125120 | H  | 42.3757660 | 50.3482450 | 33.8973960 |
| O           | 42.0815640 | 42.8400550 | 36.5326400 | H  | 42.3120730 | 51.0431610 | 32.1827870 |
| H           | 42.4645350 | 42.1883370 | 37.1920620 | C  | 39.0773260 | 42.9414170 | 32.0833630 |
| C           | 43.6975120 | 44.6180070 | 36.7752350 | H  | 39.4765760 | 42.1093020 | 31.4910110 |
| H           | 44.5248830 | 43.9317560 | 36.5983060 | H  | 39.0301410 | 43.8168250 | 31.4299820 |
| C           | 43.9403800 | 46.0015770 | 36.9153870 | C  | 40.0966560 | 43.2158200 | 33.1967810 |
| H           | 44.9626260 | 46.3668500 | 36.8705380 | O  | 39.8711320 | 42.5428500 | 34.3153980 |
| O           | 39.9203460 | 43.4308620 | 38.1732140 | O  | 41.0581660 | 43.9472700 | 33.0150900 |
| O           | 40.5793530 | 44.7121670 | 38.3039950 | Fe | 39.8586090 | 42.9339110 | 36.1539780 |
| H           | 40.0701860 | 37.9178712 | 38.5175332 | C  | 42.8415920 | 47.0027060 | 37.0022510 |
| H           | 43.8862614 | 39.1972853 | 41.0286163 | C  | 43.1608600 | 48.4846310 | 37.1115930 |
| H           | 34.4103177 | 43.4223066 | 35.8243596 | C  | 42.3644660 | 49.3241370 | 36.1080860 |
| H           | 39.1469617 | 51.9711373 | 32.0705880 | O  | 42.8777170 | 49.4370900 | 34.9601940 |
| H           | 38.0342270 | 42.6143922 | 32.4977429 | O  | 41.2659930 | 49.8205970 | 36.4822200 |
|             |            |            |            | H  | 42.9510840 | 48.8360300 | 38.1272080 |
| <b>7TS4</b> |            |            |            | H  | 44.2261210 | 48.6383380 | 36.9144990 |
| C           | 40.1260820 | 38.8635530 | 37.7429360 | C  | 41.5453320 | 46.5583410 | 37.0825750 |
| N           | 41.0562020 | 38.8891110 | 36.7276700 | H  | 40.7230950 | 47.2600290 | 37.1834360 |
| H           | 41.7865930 | 38.1854670 | 36.5512130 | C  | 41.2014890 | 45.1097600 | 37.0063130 |
| C           | 41.0060630 | 40.1064220 | 36.1455950 | O  | 40.2637260 | 44.7616400 | 36.0334510 |
| H           | 41.6650620 | 40.3980100 | 35.3437570 | C  | 42.4124620 | 44.2131730 | 36.8563430 |
| N           | 40.0591350 | 40.8493650 | 36.7007160 | O  | 42.0660410 | 42.9005670 | 36.8566300 |
| C           | 39.5023600 | 40.0815650 | 37.7050130 | H  | 41.3418870 | 42.8736340 | 37.7881080 |
| H           | 38.7267110 | 40.4633070 | 38.3513870 | C  | 43.6847460 | 44.6939860 | 36.7583500 |
| C           | 43.5356410 | 39.5668340 | 40.4432800 | H  | 44.5144200 | 43.9968480 | 36.6604740 |
| N           | 44.3532740 | 40.0704330 | 39.4528360 | C  | 43.9119660 | 46.0851720 | 36.8219860 |
| H           | 45.3523300 | 39.9529280 | 39.3671120 | H  | 44.9270880 | 46.4633150 | 36.7417760 |
| C           | 43.5475440 | 40.6866750 | 38.5391470 | O  | 40.2301410 | 43.3508510 | 38.2664450 |
| H           | 43.9290010 | 41.1688210 | 37.6495860 | O  | 40.5708500 | 44.7826280 | 38.3008920 |
| N           | 42.2842850 | 40.6274800 | 38.8977670 | H  | 40.0254698 | 38.0334186 | 38.4382191 |
| C           | 42.2657050 | 39.9309170 | 40.0845120 | H  | 43.8882886 | 39.0165098 | 41.3075116 |
| H           | 41.3430800 | 39.7458570 | 40.6194860 | H  | 34.4971848 | 43.4636368 | 35.8630705 |
| C           | 35.5385230 | 43.5426070 | 36.1691020 | H  | 39.1251839 | 52.0786644 | 32.0424170 |
| N           | 36.0526430 | 44.5841930 | 36.9161380 | H  | 38.0481744 | 42.6675572 | 32.4280862 |
| H           | 35.5365330 | 45.3754840 | 37.3067420 |    |            |            |            |

|           |            |            |            |    |            |            |            |
|-----------|------------|------------|------------|----|------------|------------|------------|
| <b>74</b> |            |            |            | C  | 39.0051250 | 42.9212620 | 32.0136290 |
| C         | 40.1918170 | 38.7936320 | 37.7420620 | H  | 39.4214000 | 42.0904730 | 31.4317290 |
| N         | 41.1604930 | 38.8161960 | 36.7624970 | H  | 38.9518470 | 43.7927140 | 31.3559380 |
| H         | 41.8830010 | 38.1039030 | 36.5897560 | C  | 40.0017150 | 43.2152160 | 33.1393180 |
| C         | 41.0889120 | 40.0108840 | 36.1309490 | O  | 39.7643990 | 42.5304550 | 34.2460080 |
| H         | 41.7686830 | 40.2936780 | 35.3430910 | O  | 40.9477600 | 43.9728810 | 32.9796310 |
| N         | 40.1126370 | 40.7456330 | 36.6392240 | Fe | 39.9855310 | 42.8624220 | 36.0788310 |
| C         | 39.5390350 | 39.9926520 | 37.6427760 | C  | 42.8702370 | 46.8483550 | 37.1727560 |
| H         | 38.7272810 | 40.3713670 | 38.2452160 | C  | 43.1992490 | 48.3279470 | 37.3099580 |
| C         | 43.2757710 | 39.6805840 | 40.3302320 | C  | 42.4290570 | 49.1824880 | 36.2910270 |
| N         | 43.9634140 | 40.1153610 | 39.2117540 | O  | 43.0150310 | 49.3858970 | 35.1921940 |
| H         | 44.8765730 | 39.8122850 | 38.9000480 | O  | 41.2804000 | 49.6039150 | 36.6052430 |
| C         | 43.1270750 | 40.9247880 | 38.5020500 | H  | 42.9666400 | 48.6803460 | 38.3207850 |
| H         | 43.3960150 | 41.3951780 | 37.5657160 | H  | 44.2686060 | 48.4807150 | 37.1376320 |
| N         | 41.9628370 | 41.0547090 | 39.1093350 | C  | 41.5673090 | 46.4199900 | 37.2296230 |
| C         | 42.0442150 | 40.2776170 | 40.2454050 | H  | 40.7513280 | 47.1247850 | 37.3510250 |
| H         | 41.2183070 | 40.2038930 | 40.9410910 | C  | 41.2091370 | 44.9907020 | 37.0641070 |
| C         | 35.5703760 | 43.4756280 | 36.1479880 | O  | 40.1318900 | 44.7329120 | 36.2426410 |
| N         | 36.0996520 | 44.5166520 | 36.8842840 | C  | 42.3624510 | 44.0849900 | 36.6777660 |
| H         | 35.5949080 | 45.3228880 | 37.2591230 | O  | 41.9683510 | 42.8733140 | 36.3242430 |
| C         | 37.4218500 | 44.2864830 | 37.0536850 | H  | 40.8660030 | 42.6104780 | 38.6648160 |
| H         | 38.0759560 | 44.9619110 | 37.5807580 | C  | 43.6575870 | 44.5543640 | 36.6865780 |
| N         | 37.7756970 | 43.1524960 | 36.4657410 | H  | 44.4710290 | 43.8739680 | 36.4417310 |
| C         | 36.6245610 | 42.6406070 | 35.8952910 | C  | 43.9184600 | 45.9152850 | 36.9370830 |
| H         | 36.6245840 | 41.7161440 | 35.3383540 | H  | 44.9442430 | 46.2727220 | 36.9026740 |
| N         | 40.1422040 | 51.9460110 | 32.4203660 | O  | 40.1454610 | 43.2532810 | 38.4026100 |
| H         | 40.7643890 | 52.1360280 | 31.6433860 | O  | 40.7655180 | 44.5888160 | 38.4611880 |
| C         | 40.7039940 | 51.1498690 | 33.4037020 | H  | 40.0739090 | 37.9778762 | 38.4495223 |
| N         | 40.0501580 | 50.9004470 | 34.5346880 | H  | 43.7241720 | 39.1419824 | 41.1630288 |
| H         | 40.5104820 | 50.3524790 | 35.3336230 | H  | 34.5285651 | 43.4212453 | 35.8377232 |
| H         | 39.2193760 | 51.4371710 | 34.7469670 | H  | 39.1662225 | 51.8466122 | 32.1123270 |
| N         | 41.9190770 | 50.6620320 | 33.2210060 | H  | 37.9789268 | 42.6359604 | 32.3566692 |
| H         | 42.4432940 | 50.2073070 | 34.0577040 |    |            |            |            |
| H         | 42.3789580 | 50.8412840 | 32.3250650 |    |            |            |            |
